# Supplementary material for: Alkoxycarbonyl radicals from alkyloxalyl chlorides: photoinduced synthesis of isoquinolinediones under visible light irradiation
Source: Royal Society of Chemistry journal article supplement (doi:10.1039/d1qo01368h), 2021-01-01

## Supporting Information

### **Alkoxy carbonyl radicals from alkyloxalyl chlorides: photoinduced synthesis of isoquinolinediones under visible-light irradiation**

Mingjuan Ji,<sup>‡a</sup> Liang Xu,<sup>‡a</sup> Xiangxiang Luo,<sup>a</sup> Minghui Jiang,<sup>a</sup> Siyu Wang,<sup>a</sup> Jian-Qiang Chen,<sup>\*a</sup> and Jie Wu<sup>\*a,b,c</sup>

<sup>a</sup> School of Pharmaceutical and Materials Engineering & Institute for Advanced Studies, Taizhou University, Taizhou 318000, China.

<sup>b</sup> State Key Laboratory of Organometallic Chemistry, Shanghai Institute of Organic Chemistry, Chinese Academy of Sciences, Shanghai 200032, China.

<sup>c</sup> School of Chemistry and Chemical Engineering, Henan Normal University, Xinxiang 453007, China.

Corresponding author: [chenjq@tzc.edu.cn](mailto:chenjq@tzc.edu.cn); [jie\\_wu@fudan.edu.cn](mailto:jie_wu@fudan.edu.cn)

## Contents

|                                                                     |    |
|---------------------------------------------------------------------|----|
| 1. General information.....                                         | 2  |
| 2. General procedure for the synthesis of substrates <b>2</b> ..... | 3  |
| 3. General procedure for isoquinolinediones.....                    | 3  |
| 4. Initial studies and the reaction optimization.....               | 4  |
| 5. Devices for the photocatalytic reactions.....                    | 5  |
| 6. Further investigations .....                                     | 6  |
| 7. Characterization of products.....                                | 7  |
| 8. References.....                                                  | 21 |
| 9. NMR spectra of compounds .....                                   | 22 |

## 1. General information

All glassware was thoroughly oven-dried. Chemicals and solvents were either purchased from commercial suppliers or purified by standard techniques. Thin-layer chromatography plates were visualized by exposure to ultraviolet light and/or staining with phosphomolybdic acid followed by heating on a hot plate. Flash chromatography was carried out using silica gel (200–300 mesh).  $^1\text{H}$  NMR and  $^{13}\text{C}$  NMR spectra were recorded on a Bruker AM-400 (400 MHz). The spectra were recorded in deuteriochloroform ( $\text{CDCl}_3$ ) as solvent at room temperature,  $^1\text{H}$  and  $^{13}\text{C}$  NMR chemical shifts are reported in ppm relative to the residual solvent peak. The residual solvent signals were used as references and the chemical shifts were converted to the TMS scale ( $\text{CDCl}_3$ :  $\delta_{\text{H}} = 7.26$  ppm,  $\delta_{\text{C}} = 77.0$  ppm). Data for  $^1\text{H}$  NMR are reported as follows: chemical shift ( $\delta$  ppm), multiplicity (s = singlet, d = doublet, t = triplet, m = multiplet, dd = doublet, br = broad), integration, coupling constant (Hz) and assignment. Data for  $^{13}\text{C}$  NMR are reported as chemical shift. HRMS were performed on a Bruker Apex II mass instrument (ESI).

## 2. General procedure for the synthesis of substrates **2**.<sup>1</sup>

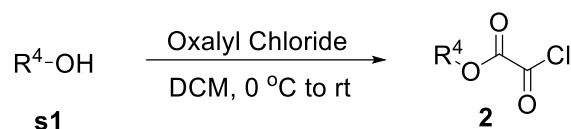

Into a 100 mL round-bottom flask equipped with a magnetic stir-bar was added solution of oxalyl chloride (20 mmol, 2 equiv.) in DCM (20 mL). The mixture was stirred at 0 °C, and a solution of an appropriate alcohol **s1** (10 mmol) in dry DCM (20 ml) was added drop-wise over 30 min. When the addition was completed, the mixture was allowed to warm to room temperature for 2 h. Excess oxalyl chloride was removed by vacuum distillation. The alkyloxyoxalyl chloride **2** was used for the next step without purification.

Ethyl chlorooxoacetate **2a** and methyl chloroglyoxylate are commercially available.

## 3. General procedure for isoquinolinediones.

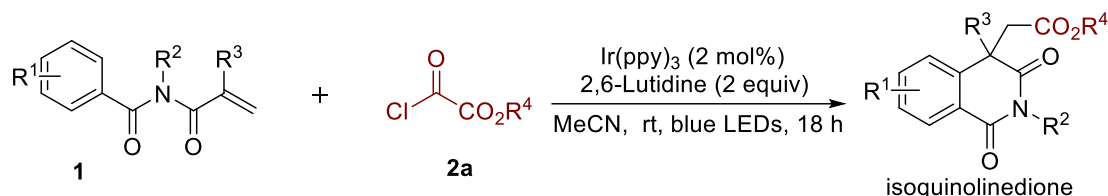

All optimization reactions were set up in a glove box under N<sub>2</sub> atmosphere. Substrate **1** (0.2 mmol), alkyloxyoxalyl chloride **2** (0.6 mmol) and 2,6-lutidine (0.4 mmol) were added to a solution of photocatalyst Ir(ppy)<sub>3</sub> (2 mol %) in dry MeCN (4 mL) at room temperature. The heterogenous mixture was placed in the irradiation apparatus equipped with 36 W blue LEDs. The resulting mixture was stirred at rt for 18 h. Upon completion of the reaction, the mixture was diluted with ethyl acetate (30 mL), washed with brine (10 x 3 mL), dried with Na<sub>2</sub>SO<sub>4</sub> and the solvent was evaporated. The crude product was purified by column chromatography on silica gel to afford the desired product.

## 4. Initial studies and the reaction optimization.

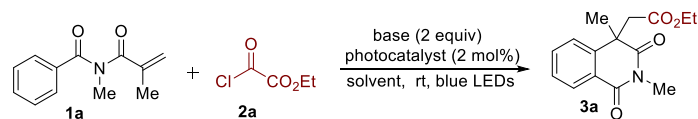

| Entry           | Photocatalyst                                | Solvent           | Base                             | Time | Yield (%) <sup>a,b</sup> |
|-----------------|----------------------------------------------|-------------------|----------------------------------|------|--------------------------|
| 1               | Ir(ppy) <sub>3</sub>                         | DMF               | 2,6-Lutidine                     | 12 h | 70                       |
| 2               | Ir(ppy) <sub>2</sub> (dtbbpy)PF <sub>6</sub> | DMF               | 2,6-Lutidine                     | 12 h | 37                       |
| 3               | 5CzBN                                        | DMF               | 2,6-Lutidine                     | 12 h | 24                       |
| 4               | 3DPA2FBN                                     | DMF               | 2,6-Lutidine                     | 12 h | 47                       |
| 5               | Ir(ppy) <sub>3</sub>                         | DMA               | 2,6-Lutidine                     | 24 h | 31                       |
| 6               | Ir(ppy) <sub>3</sub>                         | MeCN              | 2,6-Lutidine                     | 18 h | 76                       |
| 7               | Perylene                                     | MeCN              | 2,6-Lutidine                     | 18 h | 20                       |
| 8               | Pyrene                                       | MeCN              | 2,6-Lutidine                     | 18 h | 0                        |
| 9               | Eosin Y                                      | MeCN              | 2,6-Lutidine                     | 18 h | 0                        |
| 10              | Ir(ppy) <sub>3</sub>                         | THF               | 2,6-Lutidine                     | 36 h | 14                       |
| 11              | Ir(ppy) <sub>3</sub>                         | Xylenes           | 2,6-Lutidine                     | 36 h | trace                    |
| 12              | Ir(ppy) <sub>3</sub>                         | DCE               | 2,6-Lutidine                     | 48 h | 47                       |
| 13              | Ir(ppy) <sub>3</sub>                         | DCM               | 2,6-Lutidine                     | 48 h | 30                       |
| 14              | Ir(ppy) <sub>3</sub>                         | CHCl <sub>3</sub> | 2,6-Lutidine                     | 48 h | 25                       |
| 15              | Ir(ppy) <sub>3</sub>                         | EA                | 2,6-Lutidine                     | 48 h | 17                       |
| 16              | Ir(ppy) <sub>3</sub>                         | Acetone           | 2,6-Lutidine                     | 48 h | trace                    |
| 17              | Ir(ppy) <sub>3</sub>                         | MeCN              | -                                | 18 h | 29                       |
| 18              | Ir(ppy) <sub>3</sub>                         | MeCN              | 2,6-di <sup>t</sup> Bu-Py        | 18 h | 70                       |
| 19              | Ir(ppy) <sub>3</sub>                         | MeCN              | K <sub>2</sub> HPO <sub>4</sub>  | 18 h | 51                       |
| 20              | Ir(ppy) <sub>3</sub>                         | MeCN              | Na <sub>2</sub> HPO <sub>4</sub> | 18 h | 19                       |
| 21              | Ir(ppy) <sub>3</sub>                         | MeCN              | KHCO <sub>3</sub>                | 18 h | 16                       |
| 22              | -                                            | MeCN              | 2,6-Lutidine                     | 18 h | 0                        |
| 23 <sup>c</sup> | Ir(ppy) <sub>3</sub>                         | MeCN              | 2,6-Lutidine                     | 18 h | 0                        |
| 24 <sup>d</sup> | Ir(ppy) <sub>3</sub>                         | MeCN              | 2,6-Lutidine                     | 18 h | 75                       |

<sup>a</sup> Unless otherwise noted, reaction conditions are as follows: **1a** (0.2 mmol), **2a** (0.6 mmol), photocatalyst (0.004 mmol), base (0.4 mmol), solvent (4 mL), 36 W blue LEDs, under a N<sub>2</sub> atmosphere. <sup>b</sup> Yield determined by <sup>1</sup>H NMR analysis using 1,3,5-trimethoxybenzene an internal standard. <sup>c</sup> In the dark. <sup>d</sup> 72 W blue LEDs.

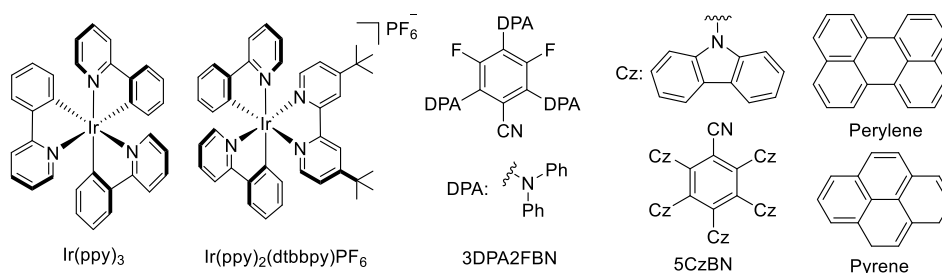

## 5. Devices for the photocatalytic reactions

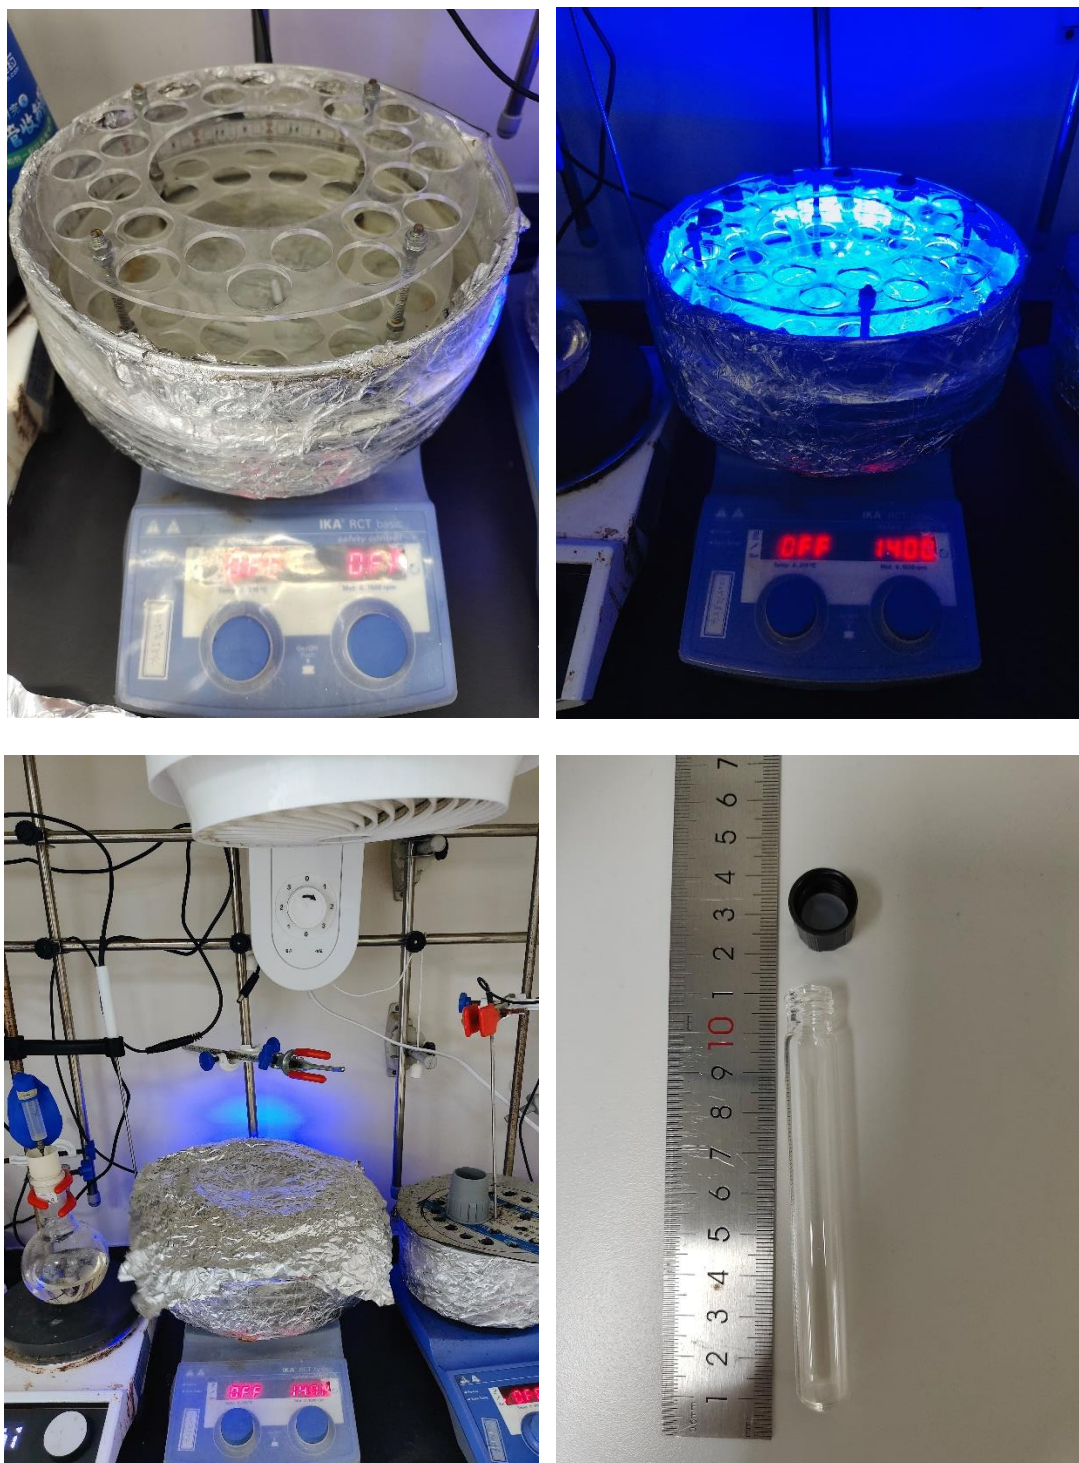

Figure S1 Devices for the photocatalytic reactions

## 6. Further investigations

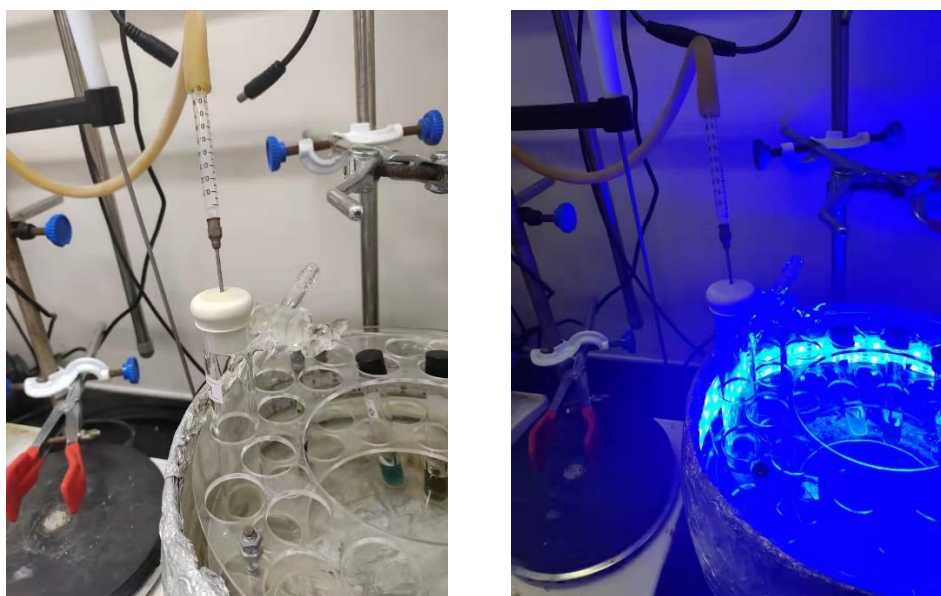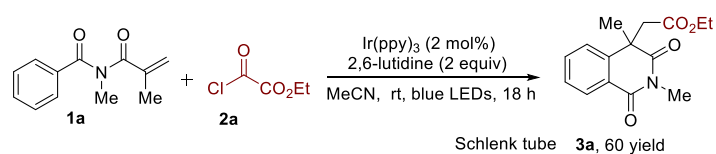

**Figure S2** When the reaction was conducted in a Schlenk tube (open with a weak N<sub>2</sub> flow), the yield of **3a** was decreased to 60%.

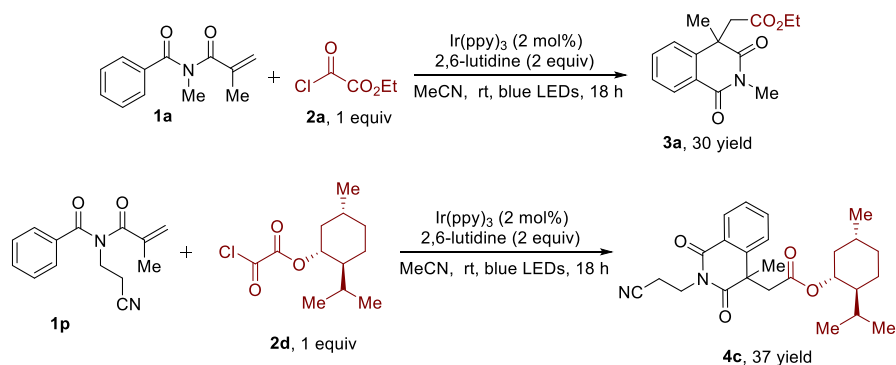

**Figure S3** By using alkyloxalyl chloride as the limiting reagent, the reaction efficiency was decreased.

## 7. Characterization of products

### ethyl 2-(2,4-dimethyl-1,3-dioxo-1,2,3,4-tetrahydroisoquinolin-4-yl)acetate (3a)

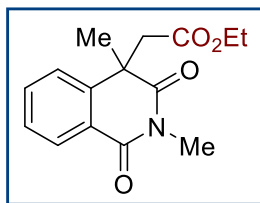

Purification by flash chromatography (PE/EA = 6/1) afforded **3a**.

Colorless oil; 40.2 mg, 73% yield;  $^1\text{H NMR}$  (400 MHz,  $\text{CDCl}_3$ )

$\delta$  (ppm) = 0.98 (t,  $J = 7.1$  Hz, 3H), 1.56 (s, 3H), 3.05 (d,  $J = 16.9$  Hz, 1H), 3.42 (s, 3H), 3.61 (d,  $J = 16.9$  Hz, 1H), 3.79–3.91 (m,

2H), 7.36 (d,  $J = 7.9$  Hz, 1H), 7.43 (td,  $J = 7.9, 1.1$  Hz, 1H), 7.62 (td,  $J = 7.9, 1.5$  Hz, 1H), 8.27 (dd,  $J = 7.9, 1.3$  Hz, 1H);  $^{13}\text{C NMR}$  (100 MHz,  $\text{CDCl}_3$ )  $\delta$  (ppm) = 13.7, 27.3, 30.5, 44.8, 44.9, 60.7, 124.2, 124.8, 127.5, 129.1, 133.9, 142.8, 164.3, 169.8, 176.2; HRMS (ESI) for  $\text{C}_{15}\text{H}_{17}\text{NO}_4\text{Na}$   $[\text{M}+\text{Na}]^+$  calcd. 298.1050, found 298.1063.

### ethyl 2-(2,4,6-trimethyl-1,3-dioxo-1,2,3,4-tetrahydroisoquinolin-4-yl)acetate (3b)

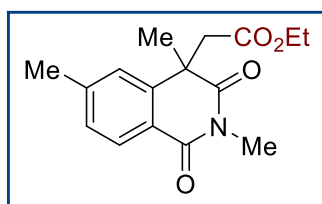

Purification by flash chromatography (PE/EA = 6/1)

afforded **3b**. Colorless oil; 22.5 mg, 39% yield;  $^1\text{H NMR}$

(400 MHz,  $\text{CDCl}_3$ )  $\delta$  (ppm) = 0.97 (t,  $J = 7.1$  Hz, 3H), 1.54 (s, 3H), 2.43 (s, 3H), 3.03 (d,  $J = 16.9$  Hz, 1H), 3.40 (s, 3H),

3.59 (d,  $J = 16.9$  Hz, 1H), 3.80–3.92 (m, 2H), 7.12 (s, 1H), 7.23 (dd,  $J = 8.0, 0.8$  Hz, 1H), 8.15 (d,  $J = 8.0$  Hz, 1H);  $^{13}\text{C NMR}$  (100 MHz,  $\text{CDCl}_3$ )  $\delta$  (ppm) = 13.8, 21.9, 27.2, 30.6, 44.8, 44.9, 60.7, 122.3, 124.7, 128.6, 129.2, 142.8, 144.7, 164.3, 169.9, 176.4; HRMS (ESI) for  $\text{C}_{16}\text{H}_{19}\text{NO}_4\text{Na}$   $[\text{M}+\text{Na}]^+$  calcd. 312.1206, found 312.1216.

### ethyl 2-(6-methoxy-2,4-dimethyl-1,3-dioxo-1,2,3,4-tetrahydroisoquinolin-4-yl)acetate (3c)

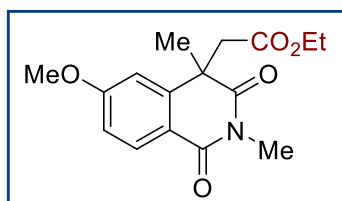

Purification by flash chromatography (PE/EA = 6/1)

afforded **3c**. Colorless oil; 30.5 mg, 50% yield;  $^1\text{H NMR}$

(400 MHz,  $\text{CDCl}_3$ )  $\delta$  (ppm) = 1.00 (t,  $J = 7.2$  Hz, 3H), 1.54 (s, 3H), 3.00 (d,  $J = 16.9$  Hz, 1H), 3.39 (s, 3H), 3.60

(d,  $J = 16.9$  Hz, 1H), 3.81–3.94 (m, 5H), 6.78 (d,  $J = 2.4$  Hz, 1H), 6.94 (dd,  $J = 8.8, 2.4$

Hz, 1H), 8.22 (d,  $J = 8.8$  Hz, 1H);  $^{13}\text{C}$  NMR (100 MHz,  $\text{CDCl}_3$ )  $\delta$  (ppm) = 13.8, 27.1, 30.7, 44.7, 45.1, 55.5, 60.7, 109.9, 112.9, 117.8, 131.5, 145.0, 164.0, 164.0, 169.8, 176.3; HRMS (ESI) for  $\text{C}_{16}\text{H}_{19}\text{NO}_5\text{Na}$   $[\text{M}+\text{Na}]^+$  calcd. 328.1155, found 328.1167.

**ethyl 2-(6-fluoro-2,4-dimethyl-1,3-dioxo-1,2,3,4-tetrahydroisoquinolin-4-yl)acetate (3d)**

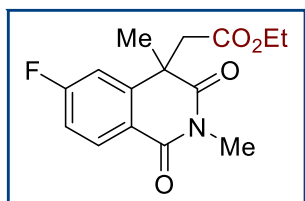

Purification by flash chromatography (PE/E = 6/1) afforded **3d**. Colorless oil; 37.5 mg, 64% yield;  $^1\text{H}$  NMR (400 MHz,  $\text{CDCl}_3$ )  $\delta$  (ppm) = 1.04 (t,  $J = 7.1$  Hz, 3H), 1.55 (s, 3H), 2.98 (d,  $J = 17.2$  Hz, 1H), 3.41 (s, 3H), 3.62 (d,  $J = 17.2$  Hz, 1H), 3.83–3.95 (m, 2H), 7.02 (dd,  $J = 9.3, 2.3$  Hz, 1H), 7.10–7.1 (m, 1H), 8.30 (dd,  $J = 8.7, 5.9$  Hz, 1H);  $^{13}\text{C}$  NMR (100 MHz,  $\text{CDCl}_3$ )  $\delta$  (ppm) = 13.8, 27.3, 30.4, 44.6, 45.1, 60.9, 111.3 ( $J = 22.9$  Hz), 115.3 ( $J = 21.9$  Hz), 121.3 ( $J = 2.6$  Hz), 132.2 ( $J = 9.6$  Hz), 145.9 ( $J = 8.2$  Hz), 163.4, 166.2 ( $J = 253.9$  Hz), 169.7, 175.8; HRMS (ESI) for  $\text{C}_{15}\text{H}_{16}\text{FNO}_4\text{Na}$   $[\text{M}+\text{Na}]^+$  calcd. 316.0956, found 316.0970.

**ethyl 2-(6-(tert-butyl)-2,4-dimethyl-1,3-dioxo-1,2,3,4-tetrahydroisoquinolin-4-yl)acetate (3e) + ethyl 2-(7-(tert-butyl)-2,4-dimethyl-1,3-dioxo-1,2,3,4-tetrahydroisoquinolin-4-yl)acetate (3e')**

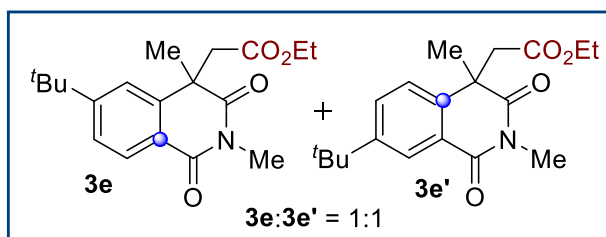

Purification by flash chromatography (PE/EA = 6/1) afforded **3e + 3e'**. Colorless oil; 49.0 mg, 74% yield;  $^1\text{H}$  NMR (400 MHz,  $\text{CDCl}_3$ )  $\delta$  (ppm) = 0.92–0.98 (m, 6H), 1.34–1.35 (m, 18H), 1.54–1.56 (m, 6H), 3.01–3.08 (m, 2H), 3.41–3.42 (m, 6H), 3.56–3.65 (m, 2H), 7.28 (d,  $J = 8.2$  Hz, 1H), 7.28 (d,  $J = 8.2$  Hz, 1H), 7.32 (d,  $J = 1.8$  Hz, 1H), 7.46 (dd,  $J = 8.4, 1.8$  Hz, 1H), 7.64 (dd,  $J = 8.2, 2.2$  Hz, 1H), 8.17 (d,  $J = 8.3$  Hz, 1H), 8.27 (d,  $J = 2.2$  Hz, 1H);  $^{13}\text{C}$  NMR (100 MHz,  $\text{CDCl}_3$ )  $\delta$  (ppm) = 13.7, 13.8, 27.2, 27.3, 30.5, 30.7, 31.0, 31.1, 34.7, 35.3, 44.6, 44.8, 45.3, 60.5, 60.6, 120.8, 122.2, 124.1, 124.3, 124.8, 125.7, 128.9, 131.2, 139.8, 142.4, 150.6, 157.6, 164.3, 164.7, 169.9,



169.9, 176.4; HRMS (ESI) for  $C_{19}H_{25}NO_4Na$   $[M+Na]^+$  calcd. 354.1676, found 354.1690.

**ethyl 2-(2,4,5,7-tetramethyl-1,3-dioxo-1,2,3,4-tetrahydroisoquinolin-4-yl)acetate (3f) + ethyl 2-(2,4,6,8-tetramethyl-1,3-dioxo-1,2,3,4-tetrahydroisoquinolin-4-yl)acetate (3f')**

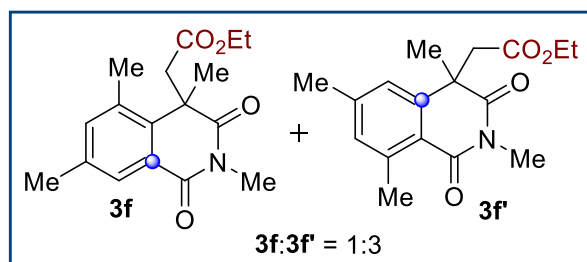

Purification by flash chromatography (PE/EA = 6/1) afforded **3f + 3f'**. Colorless oil; 53.4 mg, 88% yield;  $^1H$  NMR (400 MHz,  $CDCl_3$ )  $\delta$  (ppm) =

0.95 (t,  $J = 7.1$  Hz, 1H), 1.00 (t,  $J = 7.1$  Hz, 3H), 1.53 (s, 3H), 1.64 (s, 1H), 2.36 (s, 1H), 2.37 (s, 3H), 2.56 (s, 1H), 2.75 (s, 3H), 3.03 (d,  $J = 17.0$  Hz, 1H), 3.38 (s, 3H), 3.39–3.43 (m, 1.33H), 3.61 (d,  $J = 17.0$  Hz, 1H), 3.70 (d,  $J = 16.9$  Hz, 0.33H), 3.78–3.94 (m, 2.67H), 7.00 (s, 1H), 7.03 (d,  $J = 0.5$  Hz, 1H), 7.22 (dd,  $J = 1.4, 0.6$  Hz, 0.33H), 8.04 (dd,  $J = 1.3, 0.5$  Hz, 0.33H);  $^{13}C$  NMR (100 MHz,  $CDCl_3$ )  $\delta$  (ppm) = 13.7, 13.8, 20.6, 21.6, 22.4, 23.8, 26.7, 27.1, 27.5, 31.1, 42.9, 44.8, 44.9, 46.2, 60.5, 60.5, 120.5, 122.9, 125.8, 128.2, 132.5, 134.4, 136.7, 137.1, 139.4, 142.6, 143.2, 144.2, 164.7, 164.8, 170.0, 170.2, 176.0, 177.3; HRMS (ESI) for  $C_{17}H_{21}NO_4Na$   $[M+Na]^+$  calcd. 326.1363, found 326.1372.

**ethyl 2-(6-chloro-2,4-dimethyl-1,3-dioxo-1,2,3,4-tetrahydroisoquinolin-4-yl)acetate (3g)**

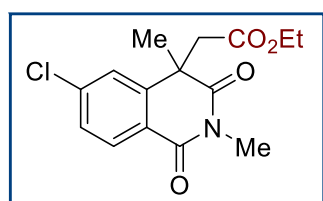

Purification by flash chromatography (PE/EA = 6/1) afforded **3g**. Colorless oil; 34.7 mg, 56% yield;  $^1H$  NMR (400 MHz,  $CDCl_3$ )  $\delta$  (ppm) = 1.04 (t,  $J = 7.2$  Hz, 3H), 1.55 (s, 3H), 3.00 (d,  $J = 17.2$  Hz, 1H), 3.41 (s, 3H), 3.61 (d,  $J =$

17.2 Hz, 1H), 3.84–3.96 (m, 2H), 7.32 (d,  $J = 1.9$  Hz, 1H), 7.41 (dd,  $J = 8.5, 1.9$  Hz, 1H), 8.21 (d,  $J = 8.5$  Hz, 1H);  $^{13}C$  NMR (100 MHz,  $CDCl_3$ )  $\delta$  (ppm) = 13.8, 27.4, 30.4, 44.6, 45.0, 60.9, 123.4, 124.5, 128.1, 130.8, 140.4, 144.6, 163.5, 169.7, 175.6; HRMS (ESI) for  $C_{15}H_{16}ClNO_4Na$   $[M+Na]^+$  calcd. 332.0660, found 332.0673.

ethyl 2-(6-bromo-2,4-dimethyl-1,3-dioxo-1,2,3,4-tetrahydroisoquinolin-4-yl)acetate (**3h**)

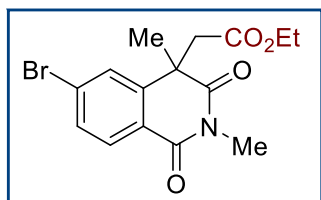

Purification by flash chromatography (PE/EA = 6/1) afforded **3h**. Colorless oil; 31.1 mg, 44% yield;  $^1\text{H NMR}$  (400 MHz,  $\text{CDCl}_3$ )  $\delta$  (ppm) = 1.04 (t,  $J = 7.1$  Hz, 3H), 1.55 (s, 3H), 3.00 (d,  $J = 17.2$  Hz, 1H), 3.40 (s, 3H), 3.60 (d,  $J = 17.2$  Hz, 1H), 3.84–3.96 (m, 2H), 7.48 (d,  $J = 1.8$  Hz, 1H), 7.57 (dd,  $J = 8.4, 1.8$  Hz, 1H), 8.13 (d,  $J = 8.4$  Hz, 1H);  $^{13}\text{C NMR}$  (100 MHz,  $\text{CDCl}_3$ )  $\delta$  (ppm) = 13.8, 27.4, 30.4, 44.6, 44.9, 60.9, 123.8, 127.5, 129.0, 130.8, 131.1, 144.7, 163.7, 169.7, 175.6; HRMS (ESI) for  $\text{C}_{15}\text{H}_{16}\text{BrNO}_4\text{Na}$   $[\text{M}+\text{Na}]^+$  calcd. 376.0155, found 376.0168.

ethyl 2-(2-cyclohexyl-4-methyl-1,3-dioxo-1,2,3,4-tetrahydroisoquinolin-4-yl)acetate (**3i**)

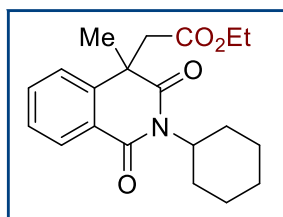

Purification by flash chromatography (PE/EA = 6/1) afforded **3i**. Colorless oil; 30.2 mg, 44% yield;  $^1\text{H NMR}$  (400 MHz,  $\text{CDCl}_3$ )  $\delta$  (ppm) = 0.96 (t,  $J = 7.1$  Hz, 3H), 1.21–1.32 (m, 1H), 1.33–1.46 (m, 2H), 1.53 (s, 3H), 1.64–1.74 (m, 3H), 1.83–1.87 (m, 2H), 2.35–2.48 (m, 2H), 3.00 (d,  $J = 16.9$  Hz, 1H), 3.59 (d,  $J = 16.9$  Hz, 1H), 3.77–3.93 (m, 2H), 4.77–4.85 (m, 1H), 7.31 (d,  $J = 7.8$  Hz, 1H), 7.41 (td,  $J = 8.0, 1.0$  Hz, 1H), 7.58 (td,  $J = 8.0, 1.4$  Hz, 1H), 8.22 (dd,  $J = 7.9, 1.3$  Hz, 1H);  $^{13}\text{C NMR}$  (100 MHz,  $\text{CDCl}_3$ )  $\delta$  (ppm) = 25.4, 26.4, 26.5, 28.6, 29.1, 30.6, 44.4, 45.3, 54.0, 60.6, 123.9, 125.5, 127.4, 129.2, 133.6, 142.7, 164.4, 169.8, 176.3; HRMS (ESI) for  $\text{C}_{20}\text{H}_{25}\text{NO}_4\text{Na}$   $[\text{M}+\text{Na}]^+$  calcd. 366.1676, found 366.1686.

ethyl 2-(2-cyclopentyl-4-methyl-1,3-dioxo-1,2,3,4-tetrahydroisoquinolin-4-yl)acetate (**3j**)

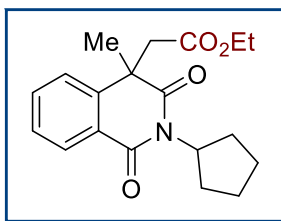

Purification by flash chromatography (PE/EA = 10/1) afforded

**3j**. Colorless oil; 32.9 mg, 50% yield;  $^1\text{H NMR}$  (400 MHz,

$\text{CDCl}_3$ )  $\delta$  (ppm) = 0.96 (t,  $J$  = 7.1 Hz, 3H), 1.54 (s, 3H),

1.60–1.65 (m, 2H), 1.82–1.93 (m, 2H), 1.96–2.14 (m, 4H),

3.01 (d,  $J$  = 16.8 Hz, 1H), 3.60 (d,  $J$  = 16.8 Hz, 1H), 3.78–3.92 (m, 2H), 5.34–5.42 (m,

1H), 7.32 (dd,  $J$  = 7.9, 0.5 Hz, 1H), 7.42 (td,  $J$  = 7.6, 1.1 Hz, 1H), 7.59 (td,  $J$  = 7.6, 1.4

Hz, 1H), 8.25 (dd,  $J$  = 7.6, 1.1 Hz, 1H);  $^{13}\text{C NMR}$  (100 MHz,  $\text{CDCl}_3$ )  $\delta$  (ppm) = 13.8,

26.0, 26.0, 28.5, 28.7, 30.5, 44.5, 45.2, 53.0, 60.6, 124.1, 125.4, 127.4, 129.2, 133.6,

142.7, 164.5, 169.8, 175.9; HRMS (ESI) for  $\text{C}_{19}\text{H}_{23}\text{NO}_4\text{Na}$   $[\text{M}+\text{Na}]^+$  calcd. 352.1519,

found 352.1530.

**ethyl 2-(2-cyclobutyl-4-methyl-1,3-dioxo-1,2,3,4-tetrahydroisoquinolin-4-yl)acetate (3k)**

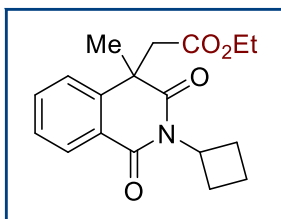

Purification by flash chromatography (PE/EA = 10/1) afforded

**3k**. Colorless oil; 41.0 mg, 65% yield;  $^1\text{H NMR}$  (400 MHz,

$\text{CDCl}_3$ )  $\delta$  (ppm) = 0.97 (t,  $J$  = 7.2 Hz, 3H), 1.55 (s, 3H),

1.73–1.86 (m, 1H), 1.87–1.97 (m, 1H), 2.361.73–2.47 (m, 2H),

2.63–2.77 (m, 2H), 3.00 (d,  $J$  = 16.9 Hz, 1H), 3.58 (d,  $J$  = 16.9 Hz, 1H), 3.79–3.91 (m,

2H), 5.05–5.14 (m, 1H), 7.32 (d,  $J$  = 7.9 Hz, 1H), 7.41 (td,  $J$  = 7.6, 1.1 Hz, 1H), 7.59

(td,  $J$  = 7.6, 1.4 Hz, 1H), 8.22 (dd,  $J$  = 7.9, 1.2 Hz, 1H);  $^{13}\text{C NMR}$  (100 MHz,  $\text{CDCl}_3$ )

$\delta$  (ppm) = 13.7, 15.6, 28.3, 28.6, 30.3, 44.4, 45.3, 48.7, 60.6, 124.1, 125.5, 127.4, 129.0,

133.6, 142.7, 164.5, 169.8, 176.2; HRMS (ESI) for  $\text{C}_{18}\text{H}_{21}\text{NO}_4\text{Na}$   $[\text{M}+\text{Na}]^+$  calcd.

338.1363, found 338.1374.

**ethyl 2-(2-cyclopropyl-4-methyl-1,3-dioxo-1,2,3,4-tetrahydroisoquinolin-4-yl)acetate (3l)**

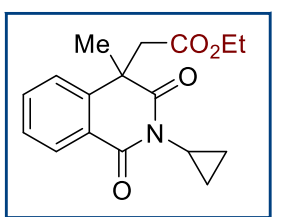

Purification by flash chromatography (PE/EA = 10/1) afforded

**3l**. Colorless oil; 41.0 mg, 68% yield;  $^1\text{H NMR}$  (400 MHz,

$\text{CDCl}_3$ )  $\delta$  (ppm) = 0.63–0.71 (m, 1H), 0.74–0.83 (m, 1H), 0.99

(t,  $J$  = 7.1 Hz, 3H), 1.11–1.22 (m, 2H), 1.52 (s, 3H), 2.75–2.81

(m, 1H), 3.02 (d,  $J = 16.9$  Hz, 1H), 3.58 (d,  $J = 16.9$  Hz, 1H), 3.79–3.93 (m, 2H), 7.33 (d,  $J = 7.8$  Hz, 1H), 7.42 (t,  $J = 7.4$  Hz, 1H), 7.59 (t,  $J = 7.4$  Hz, 1H), 8.23 (d,  $J = 7.8$  Hz, 1H);  $^{13}\text{C}$  NMR (100 MHz,  $\text{CDCl}_3$ )  $\delta$  (ppm) = 8.2, 8.6, 13.8, 24.5, 30.2, 44.5, 45.2, 60.7, 124.2, 125.4, 127.4, 129.0, 133.7, 142.7, 165.2, 169.9, 177.0; HRMS (ESI) for  $\text{C}_{17}\text{H}_{19}\text{NO}_4\text{Na}$   $[\text{M}+\text{Na}]^+$  calcd. 324.1206, found 324.1212.

**ethyl 2-(4-methyl-1,3-dioxo-2-(tetrahydro-2H-pyran-4-yl)-1,2,3,4-tetrahydroisoquinolin-4-yl)acetate (3m)**

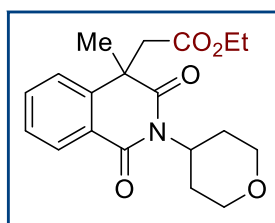

Purification by flash chromatography (PE/EA = 6/1) afforded **3m**. Colorless oil; 36.6 mg, 53% yield;  $^1\text{H}$  NMR (400 MHz,  $\text{CDCl}_3$ )  $\delta$  (ppm) = 0.98 (t,  $J = 7.1$  Hz, 3H), 1.54–1.62 (m, 5H), 2.74–2.87 (m, 2H), 3.02 (d,  $J = 16.9$  Hz, 1H), 3.47–3.55 (m, 2H), 3.59 (d,  $J = 16.9$  Hz, 1H), 3.79–3.93 (m, 2H), 4.05–4.10 (m, 2H), 5.02–5.11 (m, 1H), 7.32 (d,  $J = 7.8$  Hz, 1H), 7.42 (td,  $J = 7.6, 1.0$  Hz, 1H), 7.60 (td,  $J = 7.6, 1.4$  Hz, 1H), 8.25 (dd,  $J = 7.9, 1.2$  Hz, 1H);  $^{13}\text{C}$  NMR (100 MHz,  $\text{CDCl}_3$ )  $\delta$  (ppm) = 13.8, 28.8, 29.3, 30.5, 44.6, 45.3, 51.0, 60.7, 68.0, 68.1, 124.1, 125.3, 127.5, 129.3, 133.8, 142.7, 164.4, 169.9, 176.3; HRMS (ESI) for  $\text{C}_{19}\text{H}_{23}\text{NO}_5\text{Na}$   $[\text{M}+\text{Na}]^+$  calcd. 368.1468, found 368.1477.

**ethyl 2-(4-methyl-1,3-dioxo-2-pentyl-1,2,3,4-tetrahydroisoquinolin-4-yl)acetate (3n)**

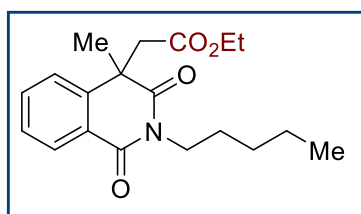

Purification by flash chromatography (PE/EA = 10/1) afforded **3n**. Colorless oil; 45.0 mg, 68% yield;  $^1\text{H}$  NMR (400 MHz,  $\text{CDCl}_3$ )  $\delta$  (ppm) = 0.90 (t,  $J = 6.9$  Hz, 3H), 0.96 (t,  $J = 7.2$  Hz, 3H), 1.31–1.40 (m, 4H), 1.61–1.69 (m, 2H), 3.05 (d,  $J = 16.9$  Hz, 1H), 3.62 (d,  $J = 16.9$  Hz, 1H), 3.78–3.93 (m, 2H), 3.95–4.08 (m, 2H), 7.34 (d,  $J = 7.8$  Hz, 1H), 7.42 (td,  $J = 7.6, 1.1$  Hz, 1H), 7.60 (td,  $J = 7.6, 1.4$  Hz, 1H), 8.26 (dd,  $J = 7.9, 1.3$  Hz, 1H);  $^{13}\text{C}$  NMR (100 MHz,  $\text{CDCl}_3$ )  $\delta$  (ppm) = 13.8, 14.0, 22.3, 27.3, 29.1, 30.7, 40.6, 44.5, 44.9, 60.6, 124.1, 124.9, 127.4, 129.2, 133.8, 142.9, 164.0, 169.8, 175.9; HRMS (ESI) for  $\text{C}_{19}\text{H}_{25}\text{NO}_4\text{Na}$   $[\text{M}+\text{Na}]^+$

calcd. 354.1676, found 354.1683.

**ethyl 2-(2-benzyl-4-methyl-1,3-dioxo-1,2,3,4-tetrahydroisoquinolin-4-yl)acetate (3o)**

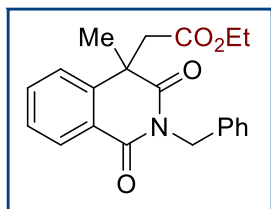

Purification by flash chromatography (PE/EA = 6/1) afforded **3o**. Colorless oil; 44.3 mg, 63% yield;  $^1\text{H NMR}$  (400 MHz,  $\text{CDCl}_3$ )  $\delta$  (ppm) = 0.85 (t,  $J = 7.2$  Hz, 3H), 1.53 (s, 3H), 3.06 (d,  $J = 17.0$  Hz, 1H), 3.61–3.73 (m, 2H), 3.81–3.89 (m, 1H), 5.19–5.27 (m, 2H), 7.19–7.24 (m, 1H), 7.25–7.30 (m, 2H), 7.34 (d,  $J = 7.9$  Hz, 1H), 7.39–7.45 (m, 3H), 7.60 (td,  $J = 7.6, 3.6$  Hz, 1H), 8.26 (dd,  $J = 7.9, 1.2$  Hz, 1H);  $^{13}\text{C NMR}$  (100 MHz,  $\text{CDCl}_3$ )  $\delta$  (ppm) = 13.6, 30.7, 43.7, 44.4, 45.2, 60.6, 124.1, 124.8, 127.2, 127.5, 128.3, 128.5, 129.3, 134.0, 137.1, 142.9, 164.0, 169.7, 176.0; HRMS (ESI) for  $\text{C}_{21}\text{H}_{21}\text{NO}_4\text{Na}$   $[\text{M}+\text{Na}]^+$  calcd. 374.1363, found 374.1369.

**ethyl 2-(2-(2-cyanoethyl)-4-methyl-1,3-dioxo-1,2,3,4-tetrahydroisoquinolin-4-yl)acetate (3p)**

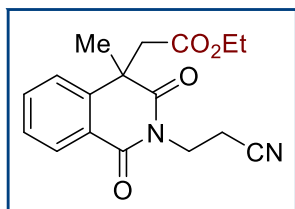

Purification by flash chromatography (PE/EA = 3/1) afforded **3p**. Colorless oil; 59.7mg, 95% yield;  $^1\text{H NMR}$  (400 MHz,  $\text{CDCl}_3$ )  $\delta$  (ppm) = 1.00 (t,  $J = 7.1$  Hz, 3H), 1.60 (s, 3H), 2.69–2.84 (m, 2H), 3.07 (d,  $J = 17.0$  Hz, 1H), 3.58 (d,  $J = 17.0$  Hz, 1H), 3.79–3.95 (m, 2H), 4.26–4.33 (m, 1H), 4.39–4.46 (m, 1H), 7.36 (d,  $J = 7.9$  Hz, 1H), 7.45 (td,  $J = 7.6, 1.1$  Hz, 1H), 7.65 (td,  $J = 7.6, 1.4$  Hz, 1H), 8.27 (dd,  $J = 7.9, 1.2$  Hz, 1H);  $^{13}\text{C NMR}$  (100 MHz,  $\text{CDCl}_3$ )  $\delta$  (ppm) = 13.8, 16.0, 30.3, 35.7, 44.9, 45.0, 60.8, 117.3, 124.3, 124.4, 127.7, 129.3, 134.3, 142.7, 163.7, 170.0, 175.8; HRMS (ESI) for  $\text{C}_{17}\text{H}_{18}\text{N}_2\text{O}_4\text{Na}$   $[\text{M}+\text{Na}]^+$  calcd. 337.1159, found 337.1170.

**diethyl 2,2'-(4-methyl-1,3-dioxo-3,4-dihydroisoquinoline-2,4(1H)-diyl)diacetate (3q)**

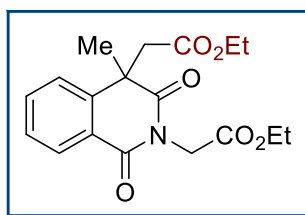

Purification by flash chromatography (PE/EA = 6/1) afforded **3q**. Colorless oil; 38.2 mg, 55% yield;  $^1\text{H NMR}$  (400 MHz,  $\text{CDCl}_3$ )  $\delta$  (ppm) = 0.97 (t,  $J$  = 7.1 Hz, 3H), 1.28 (t,  $J$  = 7.2 Hz, 3H), 1.60 (s, 3H), 3.10 (d,  $J$  = 17.1 Hz, 1H), 3.63 (d,  $J$  = 17.1 Hz, 1H), 3.81–3.97 (m, 2H), 4.16–4.27 (m, 2H), 4.75 (d,  $J$  = 16.7 Hz, 1H), 4.85 (d,  $J$  = 16.7 Hz, 1H), 7.37 (d,  $J$  = 7.9 Hz, 1H), 7.45 (t,  $J$  = 7.7 Hz, 1H), 7.64 (t,  $J$  = 7.8 Hz, 1H), 8.27 (d,  $J$  = 7.9 Hz, 1H);  $^{13}\text{C NMR}$  (100 MHz,  $\text{CDCl}_3$ )  $\delta$  (ppm) = 13.8, 14.1, 30.8, 41.4, 43.9, 45.3, 60.8, 61.4, 124.1, 124.4, 127.5, 129.4, 134.2, 143.0, 163.6, 167.9, 169.8, 175.7; HRMS (ESI) for  $\text{C}_{18}\text{H}_{21}\text{NO}_6\text{Na}$   $[\text{M}+\text{Na}]^+$  calcd. 370.1261, found 370.1268.

**ethyl 2-(4-methyl-1,3-dioxo-2-(prop-2-yn-1-yl)-1,2,3,4-tetrahydroisoquinolin-4-yl)acetate (3r)**

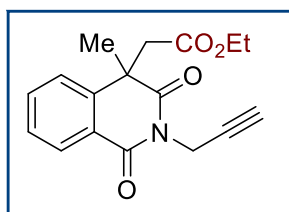

Purification by flash chromatography (PE/EA = 10/1) afforded **3r**. Colorless oil; 36.7 mg, 61% yield;  $^1\text{H NMR}$  (400 MHz,  $\text{CDCl}_3$ )  $\delta$  (ppm) = 0.96 (t,  $J$  = 7.1 Hz, 3H), 1.58 (s, 3H), 2.17 (t,  $J$  = 2.4 Hz, 1H), 3.07 (d,  $J$  = 17.0 Hz, 1H), 3.64 (d,  $J$  = 17.0 Hz, 1H), 3.77–3.94 (m, 2H), 4.81 (d,  $J$  = 2.4 Hz, 2H), 7.37 (d,  $J$  = 7.9 Hz, 1H), 7.45 (td,  $J$  = 7.6, 1.1 Hz, 1H), 7.64 (td,  $J$  = 7.6, 1.5 Hz, 1H), 8.29 (dd,  $J$  = 7.9, 1.2 Hz, 1H);  $^{13}\text{C NMR}$  (100 MHz,  $\text{CDCl}_3$ )  $\delta$  (ppm) = 13.7, 29.6, 30.4, 44.6, 45.2, 60.8, 70.4, 78.3, 124.3, 124.5, 127.6, 129.3, 134.2, 142.8, 163.2, 169.6, 175.1; HRMS (ESI) for  $\text{C}_{17}\text{H}_{17}\text{NO}_4\text{Na}$   $[\text{M}+\text{Na}]^+$  calcd. 322.1050, found 322.1062.

**ethyl 2-(4-methyl-1,3-dioxo-2-((S)-1-phenylethyl)-1,2,3,4-tetrahydroisoquinolin-4-yl)acetate (3s)**

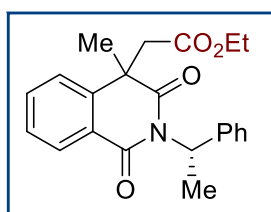

Purification by flash chromatography (PE/EA = 10/1) afforded **3s**. Colorless oil; 36.7 mg, 50% yield;  $^1\text{H NMR}$  (400 MHz,  $\text{CDCl}_3$ )  $\delta$  (ppm) = 0.90–0.95 (m, 6H), 1.43 (s, 3H), 1.59 (s, 3H), 1.87–1.90 (m, 6H), 3.00–3.05 (m, 2H), 3.56–3.63 (m, 2H), 3.72–3.99 (m, 4H), 6.32 (q,  $J$  = 7.1 Hz, 2H), 7.18–7.23 (m, 2H), 7.28–7.32 (m, 6H),

7.38–7.43 (m, 6H), 7.56–7.61 (m, 2H), 8.18–8.25 (m, 2H);  $^{13}\text{C}$  NMR (100 MHz,  $\text{CDCl}_3$ )  $\delta$  (ppm) = 13.8, 13.8, 15.9, 16.0, 30.5, 30.8, 44.0, 44.3, 45.3, 50.3, 50.3, 60.6, 60.7, 123.9, 124.0, 125.2, 125.3, 126.7, 126.7, 127.4, 127.4, 128.0, 129.3, 129.4, 133.8, 133.8, 140.7, 140.9, 142.8, 143.0, 163.8, 164.1, 169.8, 169.9, 175.5, 176.0; HRMS (ESI) for  $\text{C}_{22}\text{H}_{23}\text{NO}_4\text{Na}$   $[\text{M}+\text{Na}]^+$  calcd. 388.1519, found 388.1523.

**ethyl 2-(4-methyl-1,3-dioxo-2-((R)-1-phenylethyl)-1,2,3,4-tetrahydroisoquinolin-4-yl)acetate (3t)**

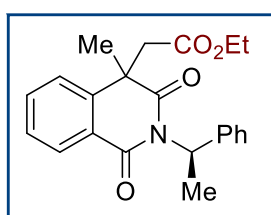

Purification by flash chromatography (PE/EA = 10/1) afforded **3t**. Colorless oil; 35.2 mg, 48% yield;  $^1\text{H}$  NMR (400 MHz,  $\text{CDCl}_3$ )  $\delta$  (ppm) = 0.90–0.95 (m, 6H), 1.43 (s, 3H), 1.59 (s, 3H), 1.87–1.90 (m, 6H), 3.00–3.05 (m, 2H), 3.56–3.63 (m, 2H), 3.72–3.98 (m, 4H), 6.32 (q,  $J = 7.1$  Hz, 2H), 7.18–7.23 (m, 2H), 7.28–7.32 (m, 6H), 7.38–7.43 (m, 6H), 7.56–7.61 (m, 2H), 8.18–8.25 (m, 2H);  $^{13}\text{C}$  NMR (100 MHz,  $\text{CDCl}_3$ )  $\delta$  (ppm) = 13.8, 13.8, 15.9, 16.0, 30.5, 30.8, 44.0, 44.3, 45.3, 50.3, 50.3, 60.6, 60.7, 124.0, 124.0, 125.2, 125.3, 126.7, 126.7, 127.4, 127.4, 128.0, 129.3, 129.4, 133.8, 133.8, 140.7, 140.9, 142.8, 143.0, 163.9, 164.1, 169.8, 169.9, 175.5, 176.0; HRMS (ESI) for  $\text{C}_{22}\text{H}_{23}\text{NO}_4\text{Na}$   $[\text{M}+\text{Na}]^+$  calcd. 388.1519, found 388.1528.

**ethyl 2-(4-benzyl-2-methyl-1,3-dioxo-1,2,3,4-tetrahydroisoquinolin-4-yl)acetate (3u)**

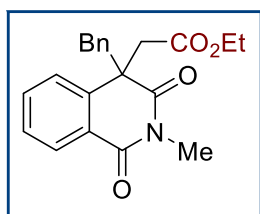

Purification by flash chromatography (PE/EA = 10/1) afforded **3u**. Colorless oil; 39.4 mg, 56% yield;  $^1\text{H}$  NMR (400 MHz,  $\text{CDCl}_3$ )  $\delta$  (ppm) = 0.96 (t,  $J = 7.2$  Hz, 3H), 2.99 (d,  $J = 12.6$  Hz, 1H), 3.16 (s, 3H), 3.23 (d,  $J = 16.9$  Hz, 1H), 3.32 (d,  $J = 12.6$  Hz, 1H), 3.79–3.92 (m, 3H), 6.45 (d,  $J = 7.1$  Hz, 2H), 7.00 (t,  $J = 7.7$  Hz, 2H), 7.09 (t,  $J = 7.4$  Hz, 1H), 7.40–7.45 (m, 2H), 7.64–7.68 (m, 1H), 8.04–8.07 (m, 1H);  $^{13}\text{C}$  NMR (100 MHz,  $\text{CDCl}_3$ )  $\delta$  (ppm) = 13.7, 26.7, 43.8, 50.0, 51.1, 60.7, 124.5, 126.6, 127.4, 127.6, 127.8, 128.6, 129.1, 133.5, 133.9, 140.3, 163.6, 169.7, 174.9; HRMS (ESI) for  $\text{C}_{21}\text{H}_{21}\text{NO}_4\text{Na}$   $[\text{M}+\text{Na}]^+$  calcd. 374.1363, found 374.1368.

**ethyl 2-(2-methyl-1,3-dioxo-4-phenyl-1,2,3,4-tetrahydroisoquinolin-4-yl)acetate (3v)**

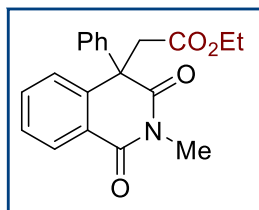

Purification by flash chromatography (PE/EA = 10/1) afforded **3v**. Colorless oil; 33.7 mg, 50% yield;  $^1\text{H NMR}$  (400 MHz,  $\text{CDCl}_3$ )  $\delta$  (ppm) = 1.01 (t,  $J = 7.1$  Hz, 3H), 3.36–3.42 (m, 4H), 3.83–3.96 (m, 2H), 4.26 (d,  $J = 16.5$  Hz, 1H), 7.05–7.07 (m, 2H), 7.18 (d,  $J = 7.8$  Hz, 1H), 7.22–7.28 (m, 3H), 7.49 (td,  $J = 7.6, 1.0$  Hz, 1H), 7.58 (td,  $J = 7.6, 1.4$  Hz, 1H), 8.34 (dd,  $J = 7.8, 1.2$  Hz, 1H);  $^{13}\text{C NMR}$  (100 MHz,  $\text{CDCl}_3$ )  $\delta$  (ppm) = 13.8, 27.6, 43.6, 52.7, 60.9, 126.2, 126.8, 127.9, 127.9, 128.9, 129.0, 133.9, 141.4, 141.5, 164.5, 169.9, 174.3; HRMS (ESI) for  $\text{C}_{20}\text{H}_{19}\text{NO}_4\text{Na}$   $[\text{M}+\text{Na}]^+$  calcd. 360.1206, found 360.1216.

**methyl 2-(2-(2-cyanoethyl)-4-methyl-1,3-dioxo-1,2,3,4-tetrahydroisoquinolin-4-yl)acetate (4a)**

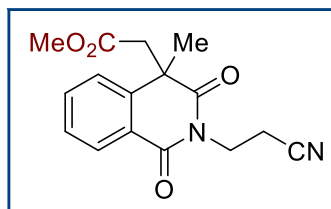

Purification by flash chromatography (PE/EA = 3/1) afforded **4a**. Colorless oil; 50.9 mg, 85% yield;  $^1\text{H NMR}$  (400 MHz,  $\text{CDCl}_3$ )  $\delta$  (ppm) = 1.60 (s, 3H), 2.69–2.84 (m, 2H), 3.10 (d,  $J = 17.2$  Hz, 1H), 3.45 (s, 3H), 3.59 (d,  $J = 17.2$  Hz, 1H), 4.26–4.33 (m, 1H), 4.40–4.47 (m, 1H), 7.36 (d,  $J = 7.9$  Hz, 1H), 7.46 (td,  $J = 7.6, 0.6$  Hz, 1H), 7.65 (td,  $J = 7.7, 1.3$  Hz, 1H), 8.27 (dd,  $J = 7.9, 1.1$  Hz, 1H);  $^{13}\text{C NMR}$  (100 MHz,  $\text{CDCl}_3$ )  $\delta$  (ppm) = 15.9, 30.3, 35.7, 44.6, 44.9, 51.9, 117.3, 124.2, 124.3, 127.7, 129.3, 134.4, 142.6, 163.6, 170.5, 175.8; HRMS (ESI) for  $\text{C}_{16}\text{H}_{16}\text{N}_2\text{O}_4\text{Na}$   $[\text{M}+\text{Na}]^+$  calcd. 323.1002, found 323.1011.

**hexadecyl 2-(2-(2-cyanoethyl)-4-methyl-1,3-dioxo-1,2,3,4-tetrahydroisoquinolin-4-yl)acetate (4b)**



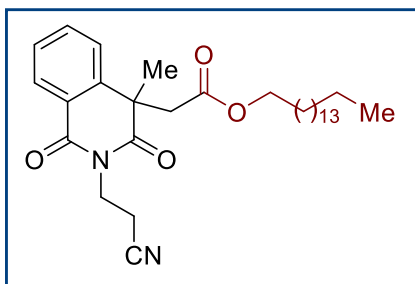

Purification by flash chromatography (PE/EA = 4/1) afforded **4b**. Colorless oil; 91.0 mg, 89% yield;  $^1\text{H}$  NMR (400 MHz,  $\text{CDCl}_3$ )  $\delta$  (ppm) = 0.88 (t,  $J$  = 6.6 Hz, 3H), 1.08–1.30 (m, 28H), 1.59 (s, 3H), 2.67–2.83 (m, 2H), 3.08 (d,  $J$  = 17.0 Hz, 1H), 3.59

(d,  $J$  = 17.0 Hz, 1H), 3.75–3.87 (m, 2H), 4.26–4.32 (m, 1H), 4.39–4.46 (m, 1H), 7.36 (d,  $J$  = 7.8 Hz, 1H), 7.45 (td,  $J$  = 7.6, 0.6 Hz, 1H), 7.64 (td,  $J$  = 7.7, 1.3 Hz, 1H), 8.26 (dd,  $J$  = 7.9, 1.1 Hz, 1H);  $^{13}\text{C}$  NMR (100 MHz,  $\text{CDCl}_3$ )  $\delta$  (ppm) = 14.1, 15.9, 22.6, 25.6, 28.3, 29.1, 29.3, 29.4, 29.5, 29.6, 29.6, 29.6, 30.3, 31.9, 35.7, 44.9, 45.0, 65.0, 117.3, 124.3, 124.4, 127.6, 129.3, 134.3, 142.7, 163.7, 170.1, 175.8; HRMS (ESI) for  $\text{C}_{31}\text{H}_{46}\text{N}_2\text{O}_4\text{Na}$   $[\text{M}+\text{Na}]^+$  calcd. 533.3350, found 533.3356.

**(1R,2S,5R)-2-isopropyl-5-methylcyclohexyl 2-(2-(2-cyanoethyl)-4-methyl-1,3-dioxo-1,2,3,4-tetrahydroisoquinolin-4-yl)acetate (4c)**

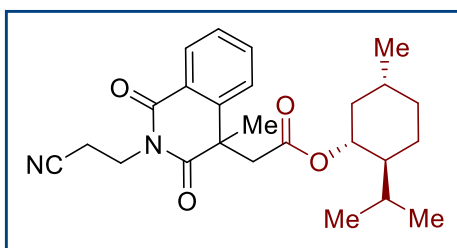

Purification by flash chromatography (PE/EA = 4/1) afforded **4c**. Colorless oil; 67.9 mg, 80% yield;  $^1\text{H}$  NMR (400 MHz,  $\text{CDCl}_3$ )  $\delta$  (ppm) = 0.32–0.56 (m, 3H), 0.58–0.67 (m, 1H), 0.71–0.94 (m, 8H), 1.05–1.13 (m, 1H),

1.22–1.35 (m, 2H), 1.42–1.61 (m, 6H), 2.68–2.84 (m, 2H), 3.00–3.08 (m, 1H), 3.57–3.63 (m, 1H), 4.25–4.47 (m, 3H), 7.37 (d,  $J$  = 7.9 Hz, 1H), 7.43–7.47 (m, 1H), 7.61–7.67 (m, 1H), 8.23–8.28 (m, 1H);  $^{13}\text{C}$  NMR (100 MHz,  $\text{CDCl}_3$ )  $\delta$  (ppm) = 15.8, 15.9, 16.0, 20.6, 20.8, 21.8, 21.8, 23.0, 23.0, 25.8, 25.9, 30.1, 30.5, 31.1, 31.2, 33.9, 35.6, 35.7, 40.3, 40.6, 45.0, 45.1, 45.6, 46.8, 46.8, 74.8, 74.9, 117.3, 117.3, 124.3, 124.4, 124.5, 127.6, 127.6, 129.2, 129.4, 134.2, 134.3, 142.7, 142.9, 163.7, 169.5, 169.5, 175.7, 175.8; HRMS (ESI) for  $\text{C}_{25}\text{H}_{32}\text{N}_2\text{O}_3\text{Na}$   $[\text{M}+\text{Na}]^+$  calcd. 447.2254, found 447.2254.

**(2S,4R)-1,7,7-trimethylbicyclo[2.2.1]heptan-2-yl 2-(2-(2-cyanoethyl)-4-methyl-1,3-dioxo-1,2,3,4-tetrahydroisoquinolin-4-yl)acetate (4d)**

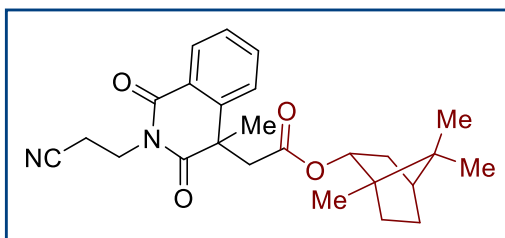

Purification by flash chromatography (PE/EA = 4/1) afforded **4d**. Colorless oil; 48.8 mg, 58% yield;  $^1\text{H NMR}$  (400 MHz,  $\text{CDCl}_3$ )  $\delta$  (ppm) = 0.39–0.61 (m, 4H), 0.74–0.78 (m, 6H), 0.93–1.02 (m, 1H),

1.11–1.20 (m, 1H), 1.52–1.69 (m, 6H), 2.02–2.11 (m, 1H), 2.70–2.84 (m, 2H), 3.11 (d,  $J = 16.1$  Hz, 1H), 3.60–3.69 (m, 1H), 4.25–4.32 (m, 1H), 4.40–4.47 (m, 1H), 4.59–4.64 (m, 1H), 7.38–7.47 (m, 2H), 7.63–7.68 (m, 1H), 8.26 (d,  $J = 7.8$  Hz, 1H);  $^{13}\text{C NMR}$  (100 MHz,  $\text{CDCl}_3$ )  $\delta$  (ppm) = 13.0, 13.2, 16.0, 16.0, 18.6, 19.5, 26.8, 26.9, 27.8, 27.8, 30.6, 30.8, 35.6, 35.7, 36.0, 36.3, 44.5, 44.5, 44.7, 44.8, 45.3, 47.6, 47.7, 48.5, 48.6, 80.5, 80.7, 117.3, 117.3, 124.2, 124.2, 124.3, 124.4, 127.7, 129.4, 134.3, 134.4, 142.7, 142.8, 163.6, 163.7, 170.3, 170.4, 175.7, 175.7; HRMS (ESI) for  $\text{C}_{25}\text{H}_{30}\text{N}_2\text{O}_4\text{Na}$   $[\text{M}+\text{Na}]^+$  calcd. 445.2098, found 445.2102.

**(3S,5S,8R,9S,10S,13R,14S,17R)-10,13-dimethyl-17-((R)-6-methylheptan-2-yl)hexadecahydro-1H-cyclopenta[a]phenanthren-3-yl 2-(2-(2-cyanoethyl)-4-methyl-1,3-dioxo-1,2,3,4-tetrahydroisoquinolin-4-yl)acetate (4e)**

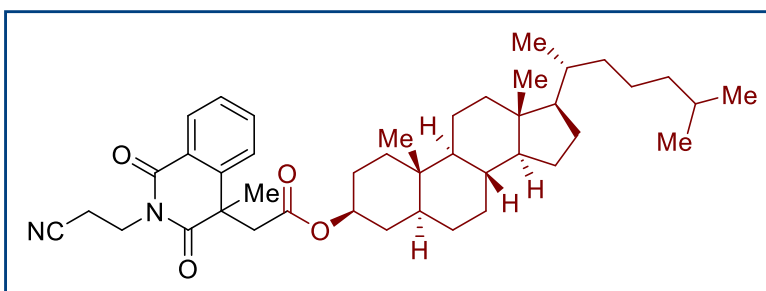

Purification by flash chromatography (PE/EA = 4/1) afforded **4e**. Colorless oil; 109.7 mg, 83% yield;  $^1\text{H NMR}$  (400 MHz,

$\text{CDCl}_3$ )  $\delta$  (ppm) = 0.50–0.56 (m, 1H), 0.62 (s, 3H), 0.72 (s, 3H), 0.84–1.42 (m, 32H), 1.45–1.62 (m, 8H), 1.73–1.83 (m, 1H), 1.91–1.94 (m, 1H), 2.69–2.83 (m, 2H), 3.01–3.05 (m, 1H), 3.55–3.59 (m, 1H), 4.25–4.46 (m, 3H), 7.36 (d,  $J = 7.9$  Hz, 1H), 7.42–7.47 (m, 1H), 7.62–7.66 (m, 1H), 8.25–8.27 (m, 1H);  $^{13}\text{C NMR}$  (100 MHz,  $\text{CDCl}_3$ )  $\delta$  (ppm) = 12.0, 12.1, 16.0, 18.6, 21.1, 22.5, 22.8, 23.8, 24.1, 26.9, 27.0, 27.9, 28.2, 28.4, 30.3, 31.8, 33.4, 33.6, 35.2, 35.3, 35.7, 35.7, 36.1, 36.4, 39.4, 39.8, 42.5, 44.3, 44.3, 45.1, 45.3, 54.0, 56.2, 56.3, 74.4, 117.3, 124.3, 124.3, 124.4, 127.6, 129.2,

134.3, 142.8, 142.8, 163.7, 169.4, 169.4, 175.8; HRMS (ESI) for C<sub>42</sub>H<sub>60</sub>N<sub>2</sub>O<sub>4</sub>Na [M+Na]<sup>+</sup> calcd. 679.4445, found 679.4446.

**(3R,5S,8R,9S,10S,13S,14S)-10,13-dimethyl-17-oxohexadecahydro-1H-cyclopenta[a]phenanthren-3-yl 2-(2-(2-cyanoethyl)-4-methyl-1,3-dioxo-1,2,3,4-tetrahydroisoquinolin-4-yl)acetate (4f)**

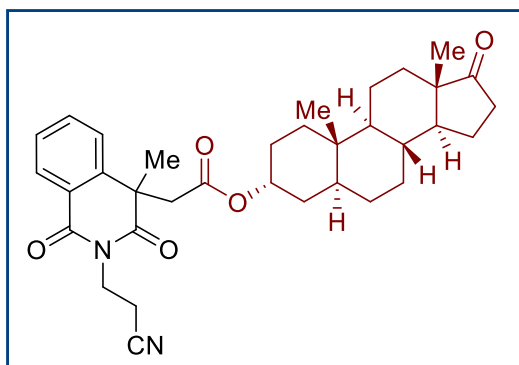

Purification by flash chromatography (PE/EA = 1.5/1) afforded **4f**. Colorless oil; 90.5 mg, 81% yield; <sup>1</sup>H NMR (400 MHz, CDCl<sub>3</sub>) δ (ppm) = 0.57–0.70 (m, 4H), 0.76–0.89 (m, 4H), 0.92–1.13 (m, 5H), 1.21–1.37 (m, 6H), 1.39–1.54 (m, 4H), 1.59–1.60 (m, 3H), 1.74–1.84 (m, 2H),

2.43–2.50 (m, 1H), 2.71–2.85 (m, 2H), 3.08–3.13 (m, 1H), 3.63–3.67 (m, 1H), 4.26–4.32 (m, 1H), 4.37–4.33 (m, 1H), 4.73–4.76 (m, 1H), 7.38–7.47 (m, 2H), 7.65 (t, *J* = 7.5 Hz, 1H), 8.25–8.27 (m, 1H); <sup>13</sup>C NMR (100 MHz, CDCl<sub>3</sub>) δ (ppm) = 11.0, 11.1, 13.8, 13.8, 16.1, 19.8, 20.0, 21.7, 25.5, 25.8, 27.8, 27.9, 30.4, 30.5, 31.0, 31.2, 31.5, 31.6, 32.1, 32.4, 32.5, 32.6, 34.8, 34.8, 35.5, 35.6, 35.6, 35.8, 39.9, 40.0, 44.4, 44.6, 45.3, 47.8, 51.5, 51.5, 53.9, 54.1, 70.8, 71.2, 117.2, 117.2, 124.2, 124.2, 124.3, 127.6, 127.7, 129.4, 129.6, 134.4, 143.0, 143.2, 163.6, 169.2, 169.3, 175.7, 175.7; HRMS (ESI) for C<sub>34</sub>H<sub>42</sub>N<sub>2</sub>O<sub>5</sub>Na [M+Na]<sup>+</sup> calcd. 581.2986, found 581.2986.

**(1R,2R)-2-(1,3-dioxoisindolin-2-yl)cyclohexyl 2-(2-(2-cyanoethyl)-4-methyl-1,3-dioxo-1,2,3,4-tetrahydroisoquinolin-4-yl)acetate (4g)**

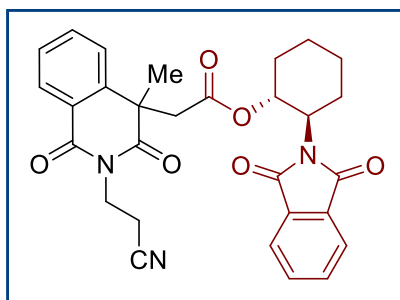

Purification by flash chromatography (PE/EA = 1.5/1) afforded **4g**. Colorless oil; 82.1 mg, 80% yield; *Product 1*, <sup>1</sup>H NMR (400 MHz, CDCl<sub>3</sub>) δ (ppm) = 1.05–1.15 (m, 1H), 1.24–1.34 (m, 2H), 1.45 (s, 3H), 1.68–1.82 (m, 4H), 2.13–2.23 (m, 1H), 2.68–2.84 (m, 2H), 2.88 (d, *J* = 17.2 Hz, 1H), 3.49 (d, *J* = 17.2 Hz,

1H), 3.95–4.02 (m, 1H), 4.22–4.29 (m, 1H), 4.37–4.44 (m, 1H), 5.20–5.27 (m, 1H), 6.95–6.99 (m, 2H), 7.07–7.14 (m, 1H), 7.73–7.76 (m, 4H), 8.04 (d,  $J = 7.8$  Hz, 1H);  $^{13}\text{C}$  NMR (100 MHz,  $\text{CDCl}_3$ )  $\delta$  (ppm) = 16.0, 23.5, 24.7, 28.4, 30.6, 31.2, 35.6, 44.3, 44.8, 53.2, 72.2, 117.4, 123.2, 123.4, 124.0, 127.2, 129.0, 131.5, 133.7, 133.8, 142.4, 163.5, 167.6, 169.0, 175.5; **Product 2**,  $^1\text{H}$  NMR (400 MHz,  $\text{CDCl}_3$ )  $\delta$  (ppm) = 1.21–1.22 (m, 3H), 1.42 (s, 3H), 1.67–1.76 (m, 4H), 2.22–2.41 (m, 2H), 2.54–2.63 (m, 1H), 2.96 (d,  $J = 17.2$  Hz, 1H), 3.29 (d,  $J = 17.2$  Hz, 1H), 3.97 (t,  $J = 7.5$  Hz, 2H), 4.02–4.09 (m, 1H), 5.20–5.26 (m, 1H), 7.26–7.28 (m, 1H), 7.35–7.38 (m, 1H), 7.56–7.60 (m, 1H), 7.78–7.81 (m, 2H), 7.85–7.88 (m, 1H), 8.15 (dd,  $J = 7.9, 1.0$  Hz, 1H);  $^{13}\text{C}$  NMR (100 MHz,  $\text{CDCl}_3$ )  $\delta$  (ppm) = 15.5, 23.6, 24.8, 28.3, 30.2, 31.2, 35.4, 44.4, 44.8, 53.5, 72.4, 117.3, 123.2, 124.1, 124.2, 127.5, 129.2, 131.7, 134.0, 134.2, 142.5, 163.5, 168.1, 169.6, 175.2; HRMS (ESI) for  $\text{C}_{29}\text{H}_{27}\text{N}_3\text{O}_6\text{Na}$   $[\text{M}+\text{Na}]^+$  calcd. 536.1792, found 536.1798.

**(R)-2-(1,3-dioxisoindolin-2-yl)-3,3-dimethylbutyl 2-(2-(2-cyanoethyl)-4-methyl-1,3-dioxo-1,2,3,4-tetrahydroisoquinolin-4-yl)acetate (4h)**

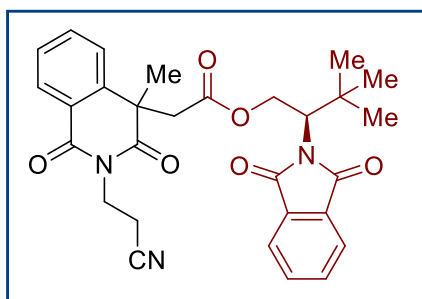

Purification by flash chromatography (PE/EA = 1.5/1) afforded **4h**. Colorless oil; 90.0 mg, 87% yield;  $^1\text{H}$  NMR (400 MHz,  $\text{CDCl}_3$ )  $\delta$  (ppm) = 0.94–0.96 (m, 9H), 1.47–1.49 (m, 3H), 2.63–2.82 (m, 2H), 2.92–2.99 (m, 1H), 3.42–3.49 (m, 1H), 4.04–4.13 (m, 1H), 4.16–4.43 (m, 3H), 4.72–4.82

(m, 1H), 7.14–7.25 (m, 1H), 7.31–7.64 (m, 2H), 7.77–7.90 (m, 4H), 8.11–8.15 (m, 1H);  $^{13}\text{C}$  NMR (100 MHz,  $\text{CDCl}_3$ )  $\delta$  (ppm) = 15.8, 15.9, 27.6, 27.7, 30.4, 30.5, 35.1, 35.2, 35.6, 35.6, 44.0, 44.2, 44.8, 44.9, 59.0, 59.0, 60.7, 60.8, 117.3, 123.1, 123.2, 123.4, 123.4, 124.0, 124.0, 124.1, 127.5, 127.6, 129.2, 129.3, 131.1, 131.2, 131.8, 133.9, 134.0, 134.1, 134.2, 134.2, 134.4, 142.4, 142.4, 163.5, 163.5, 168.5, 168.6, 168.8, 169.0, 169.9, 169.9, 175.5, 175.5; HRMS (ESI) for  $\text{C}_{29}\text{H}_{29}\text{N}_3\text{O}_6\text{Na}$   $[\text{M}+\text{Na}]^+$  calcd. 538.1949, found 538.1952.

## 8. References

- (1) Zhao, Y.; Wang, G.; Li, Y.; Wang, S.; Li, Z. *Chin. J. Chem.* **2010**, *28*, 475.
- (2) Poldy, J.; Peakall, R.; Barrow, R. A. *Eur. J. Org. Chem.* **2012**, 5818.
- (3) Arjomandia, O. K.; Kavosic, M.; Adibi, H. *Bioorg. Chem.* **2019**, *92*, 103277.
- (4) Yasuda, M.; Yamasaki, S.; Onishi, Y.; Baba, A. *J. Am. Chem. Soc.* **2004**, *126*, 7186.
- (5) Canestrari, D.; Lancianesi, S.; Badiola, E.; Strinna, C.; Ibrahim, H.; Adamo, M. F. *A. Org. Lett.* **2017**, *19*, 918.
- (6) Vanos, C. M.; Lambert, T. H. *Angew. Chem., Int. Ed.* **2011**, *50*, 12222.



ethyl 2-(2,4,6-trimethyl-1,3-dioxo-1,2,3,4-tetrahydroisoquinolin-4-yl)acetate (3b)

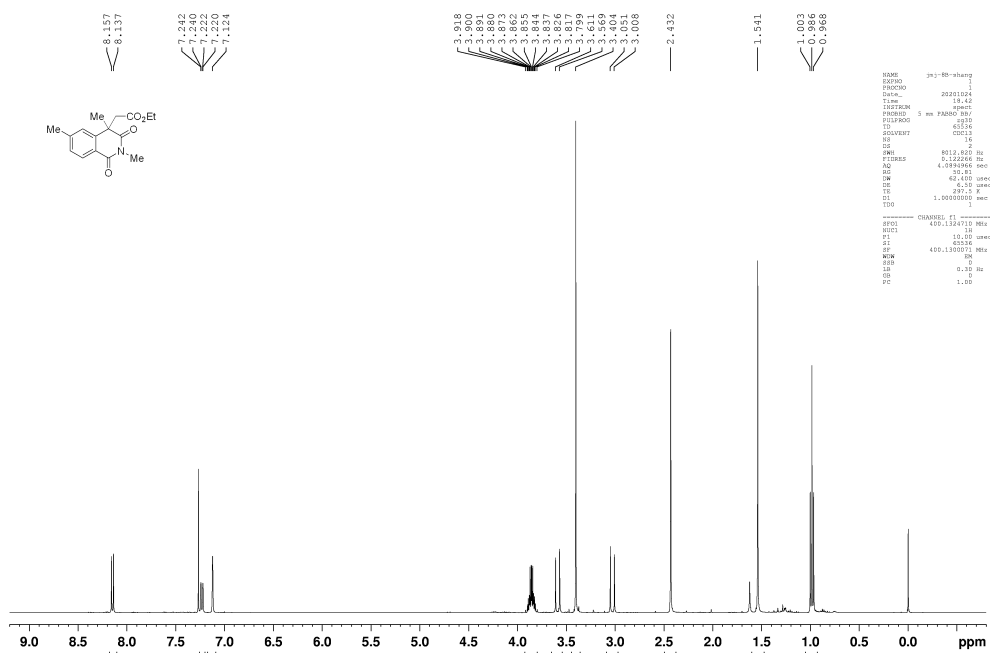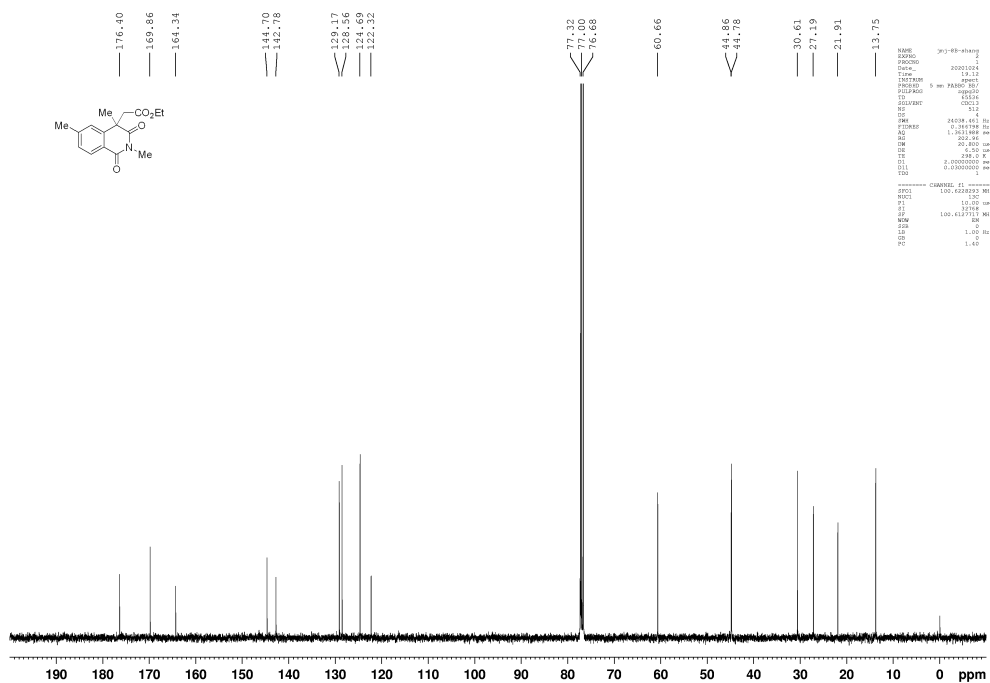

ethyl 2-(6-methoxy-2,4-dimethyl-1,3-dioxo-1,2,3,4-tetrahydroisoquinolin-4-yl)acetate (3c)

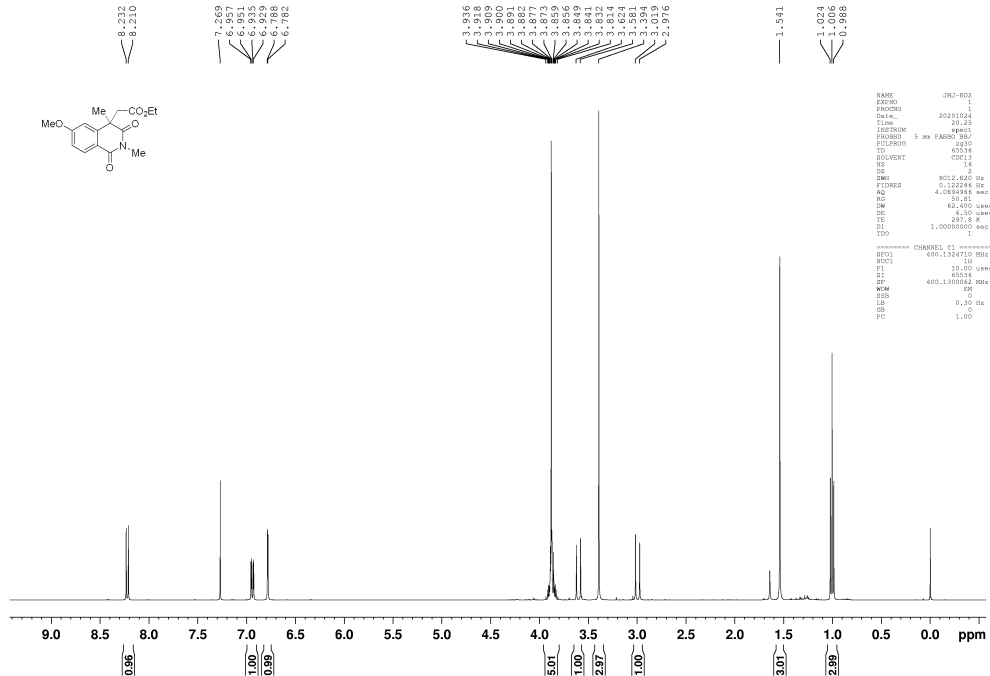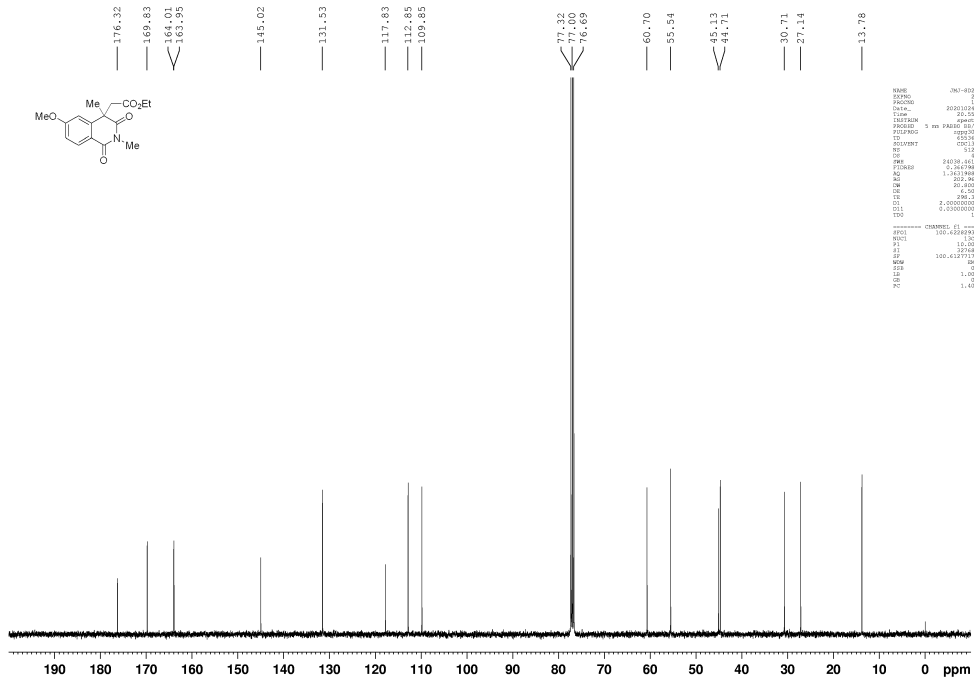



ethyl 2-(6-fluoro-2,4-dimethyl-1,3-dioxo-1,2,3,4-tetrahydroisoquinolin-4-yl)acetate (3d)

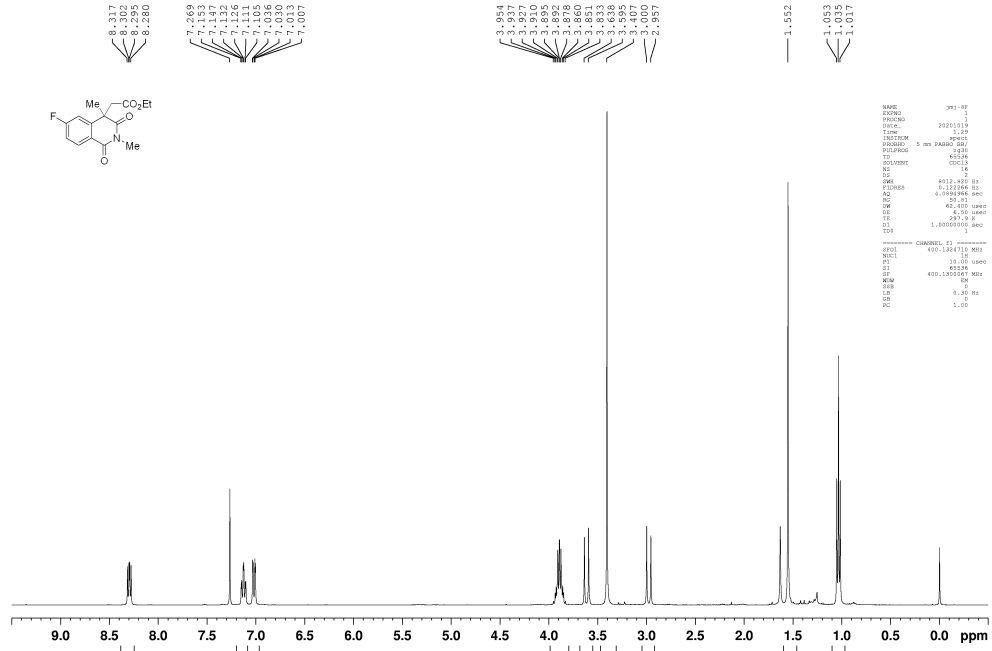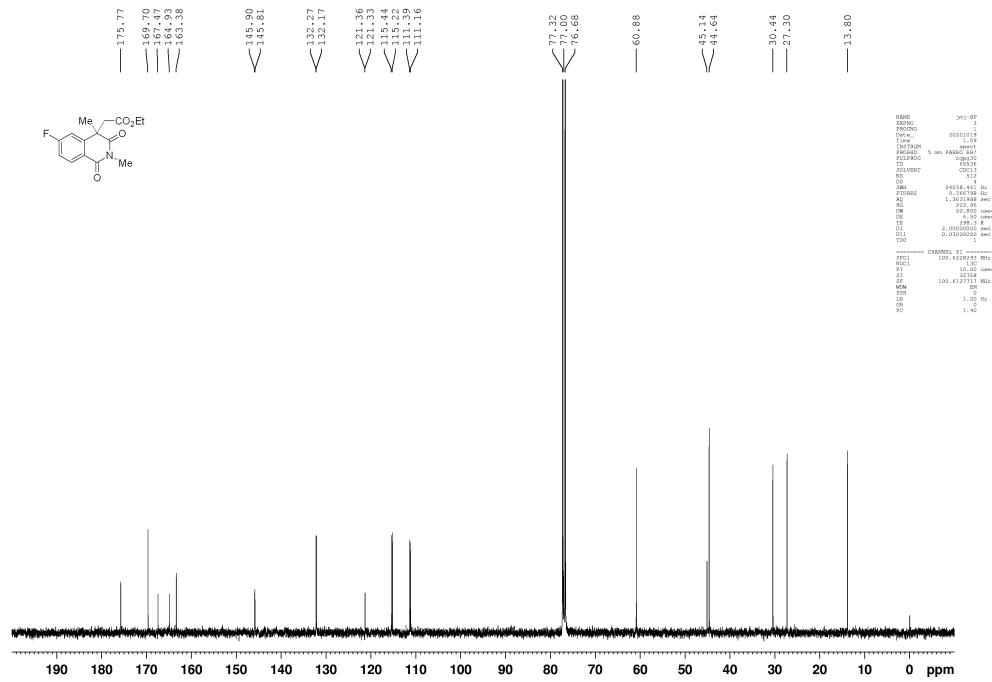

ethyl 2-(6-(tert-butyl)-2,4-dimethyl-1,3-dioxo-1,2,3,4-tetrahydroisoquinolin-4-yl)acetate (3e) + ethyl 2-(7-(tert-butyl)-2,4-dimethyl-1,3-dioxo-1,2,3,4-tetrahydroisoquinolin-4-yl)acetate (3e')

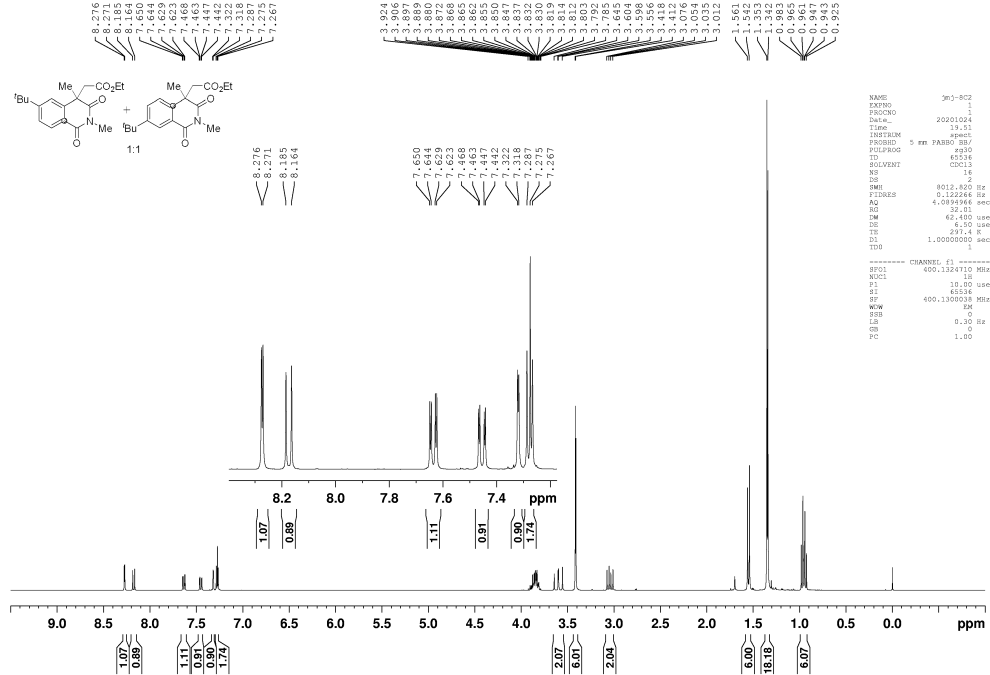

```

NAME          3e+3e'
EXPNO         1
PROCNO        1
Date_         20201024
Time         19:35:11
INSTRUM       spect
PROBHD        5 mm PABBO BB7
PULPROG       zgpg30
TD            65536
SOLVENT       CDCl3
NS            16
DS            2
SWH           8012.820 Hz
F2 - F1       2.122348 Hz
AQ            4.9895948 sec
RG            32.01
DM            62.480 usec
DE            6.50 usec
TE            297.4 K
D1            1.00000000 sec
TD0           1
----- CHANNEL f1 -----
SFO1          400.1324110 MHz
NUC1          13C
P1            16.00 usec
PL1           0.00 dB
SFO2          400.1300038 MHz
NUC2          1H
P2            0.00 usec
PL2           0.00 dB
PC            1.00
    
```

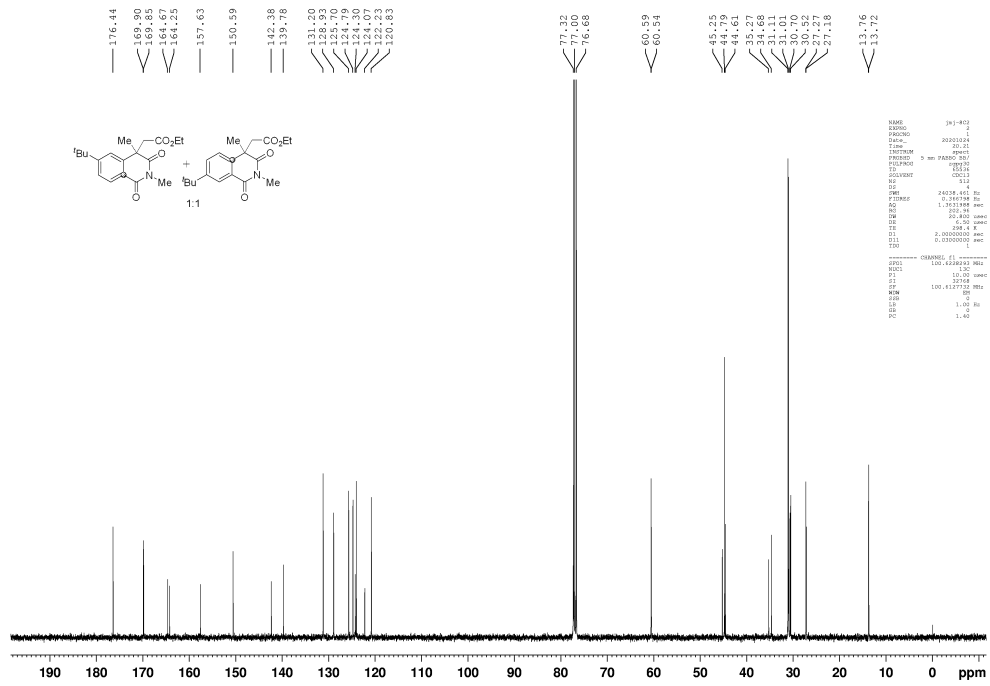

```

NAME          3e+3e'
EXPNO         1
PROCNO        1
Date_         20201024
Time         09:47:00
INSTRUM       spect
PROBHD        5 mm PABBO BB7
PULPROG       zgpg30
TD            65536
SOLVENT       CDCl3
NS            16
DS            2
SWH           76036.451 Hz
F2 - F1       100.626132 MHz
AQ            1.181188 sec
RG            32.01
DM            62.480 usec
DE            6.50 usec
TE            297.4 K
D1            1.00000000 sec
TD0           1
----- CHANNEL f1 -----
SFO1          100.626132 MHz
NUC1          13C
P1            16.00 usec
PL1           0.00 dB
SFO2          100.6127332 MHz
NUC2          1H
P2            0.00 usec
PL2           0.00 dB
PC            1.00
    
```

ethyl 2-(2,4,5,7-tetramethyl-1,3-dioxo-1,2,3,4-tetrahydroisoquinolin-4-yl)acetate (3f) + ethyl 2-(2,4,6,8-tetramethyl-1,3-dioxo-1,2,3,4-tetrahydroisoquinolin-4-yl)acetate (3f')

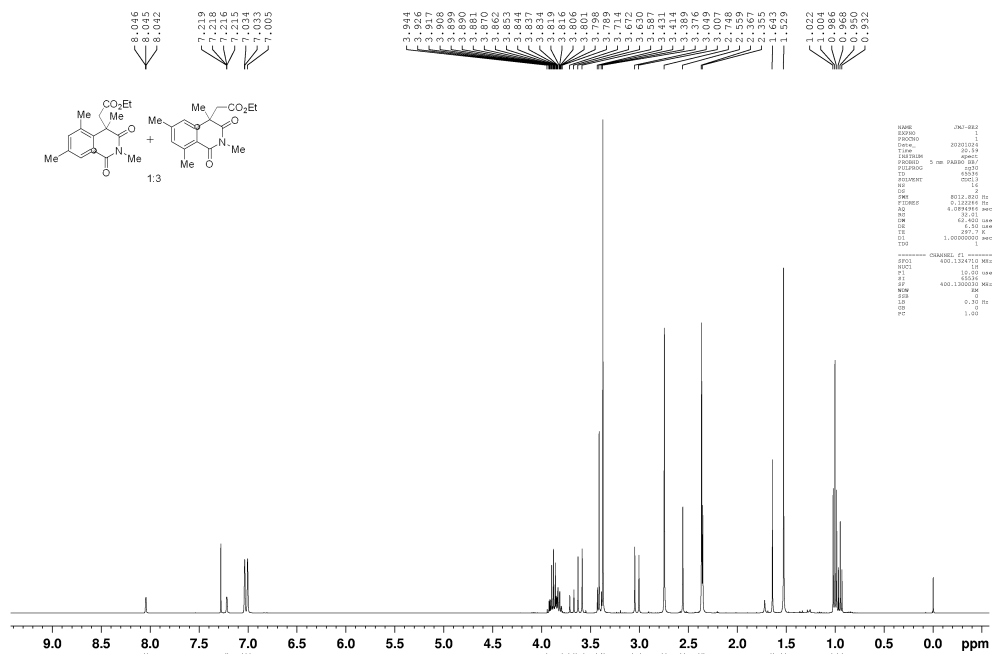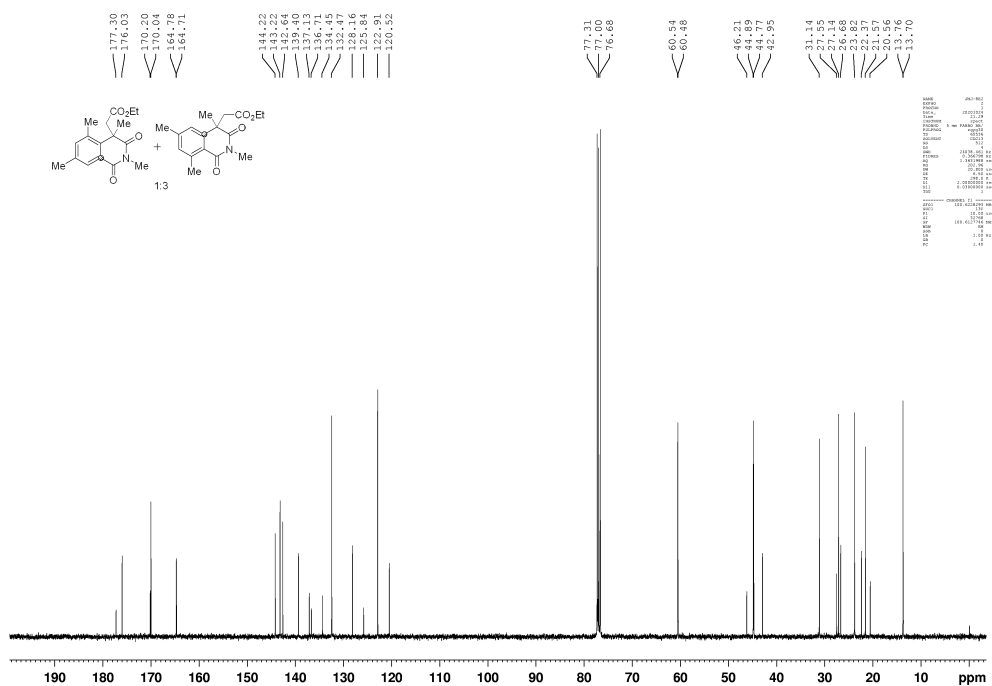

ethyl 2-(6-chloro-2,4-dimethyl-1,3-dioxo-1,2,3,4-tetrahydroisoquinolin-4-yl)acetate (3g)

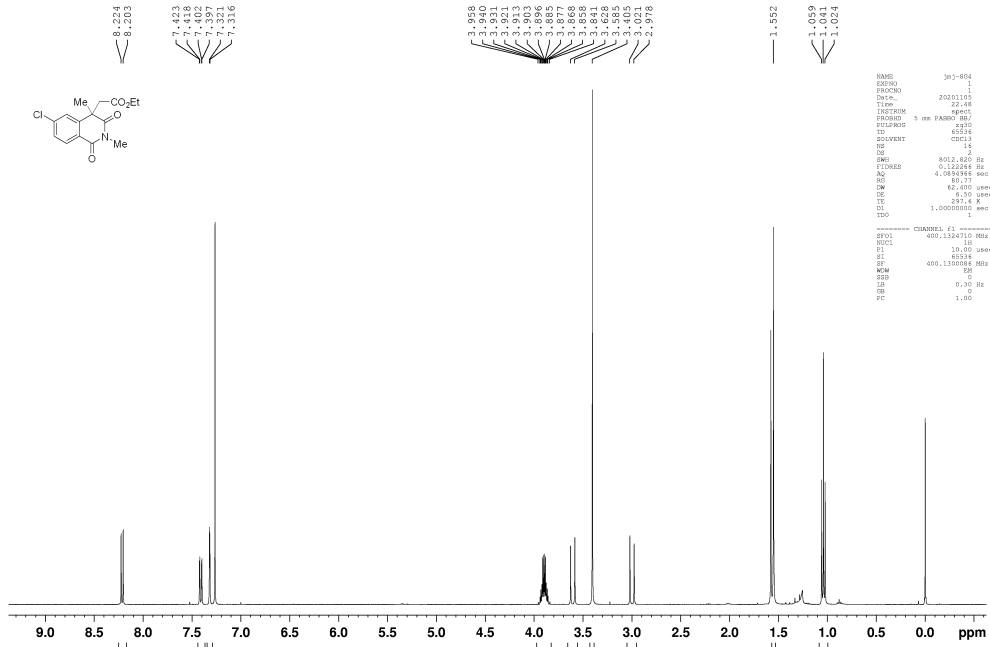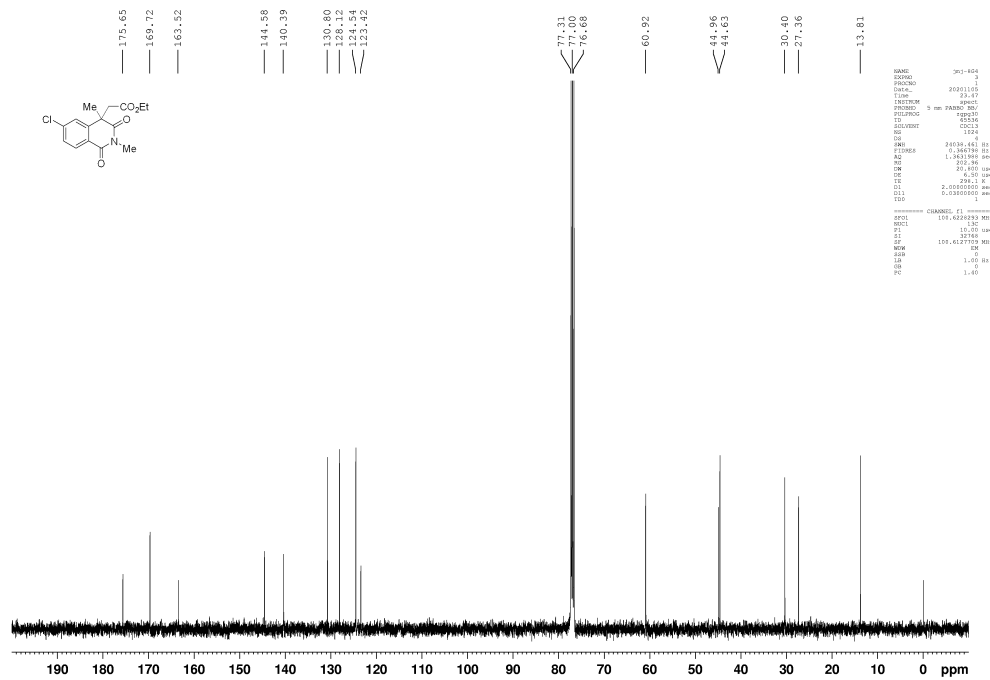

ethyl 2-(6-bromo-2,4-dimethyl-1,3-dioxo-1,2,3,4-tetrahydroisoquinolin-4-yl)acetate (3h)

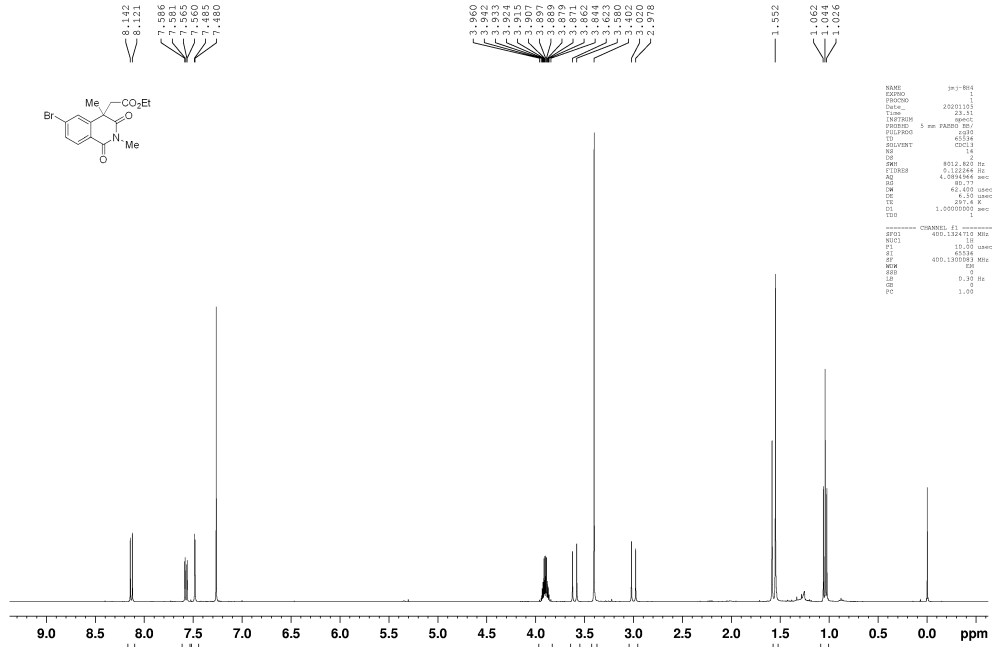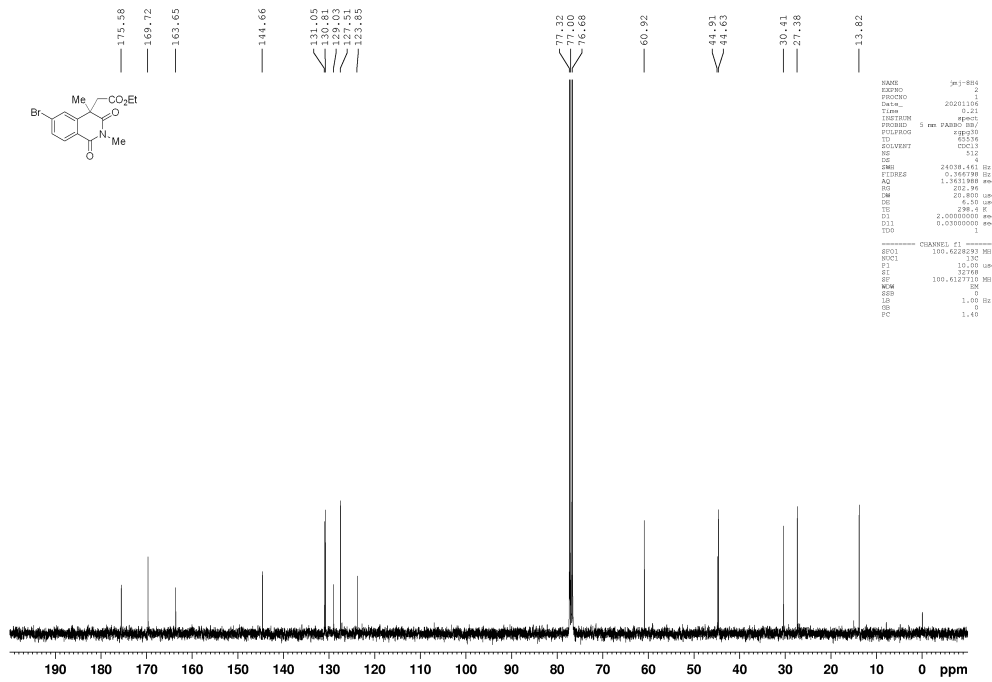

ethyl 2-(2-cyclohexyl-4-methyl-1,3-dioxo-1,2,3,4-tetrahydroisoquinolin-4-yl)acetate (3i)

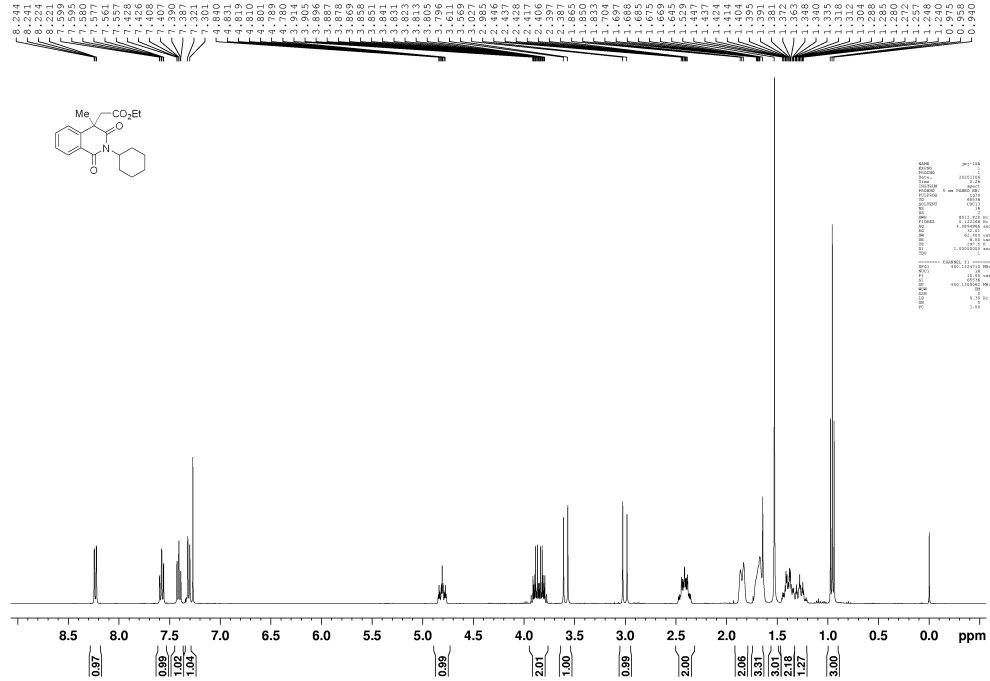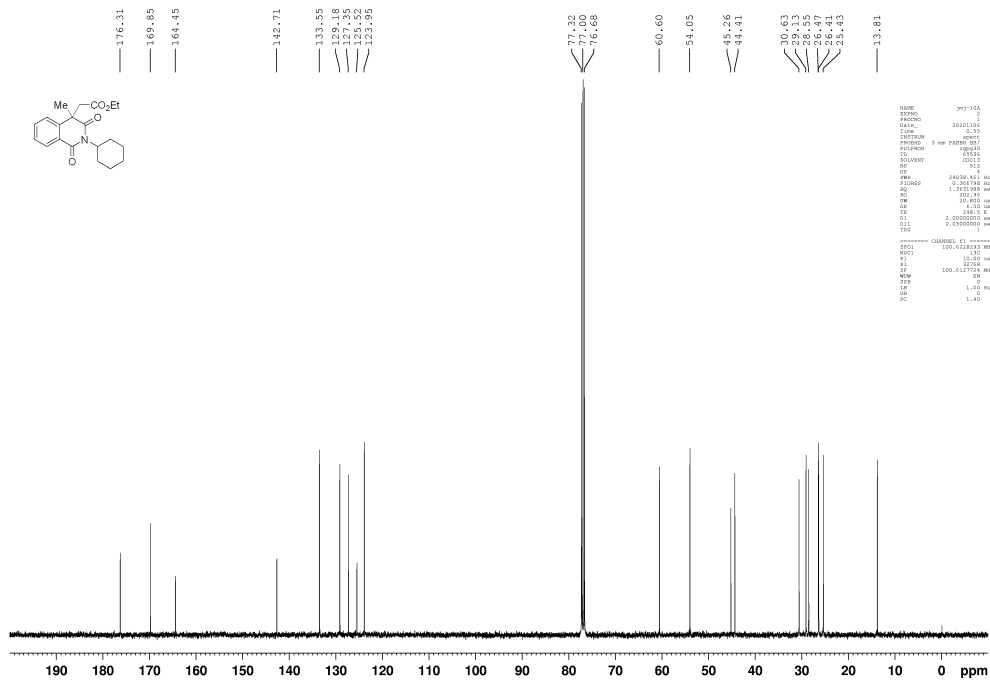



ethyl 2-(2-cyclobutyl-4-methyl-1,3-dioxo-1,2,3,4-tetrahydroisoquinolin-4-yl)acetate (3k)

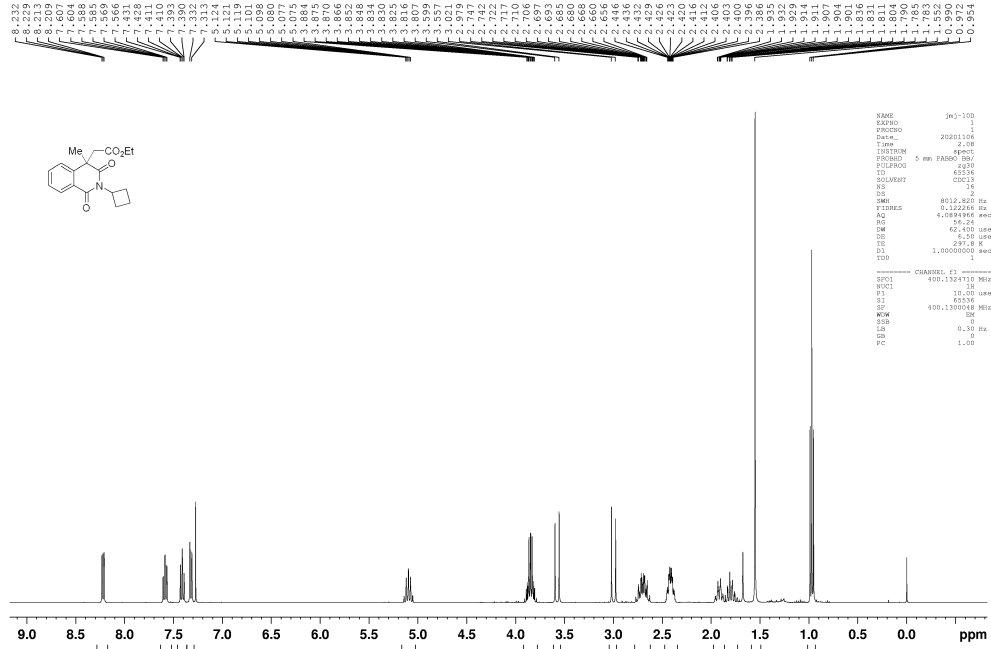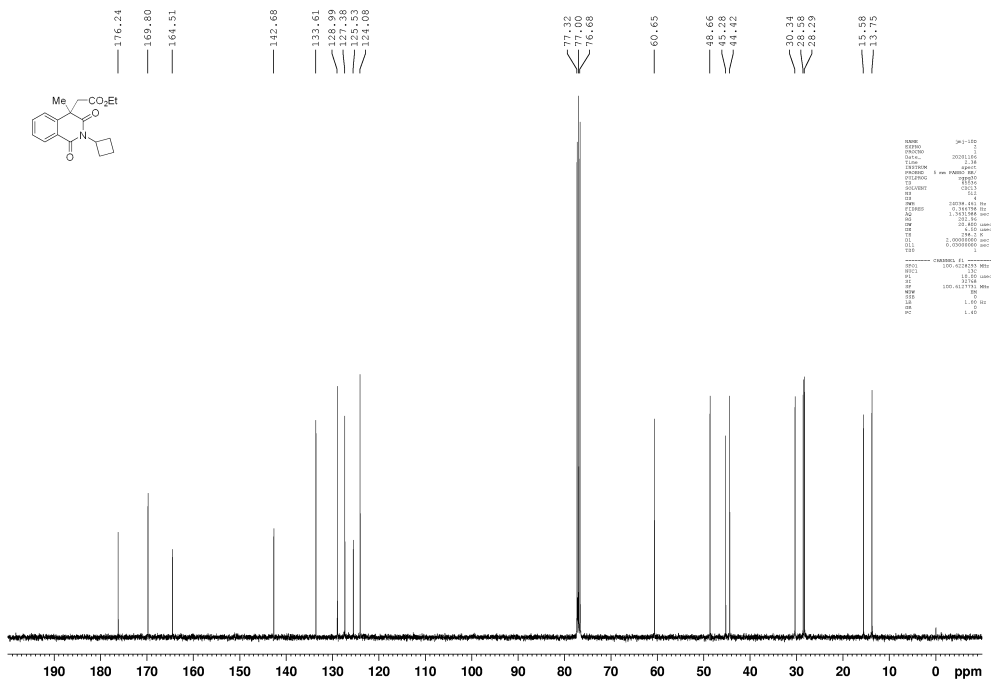



ethyl 2-(2-cyclopropyl-4-methyl-1,3-dioxo-1,2,3,4-tetrahydroisoquinolin-4-yl)acetate (3l)

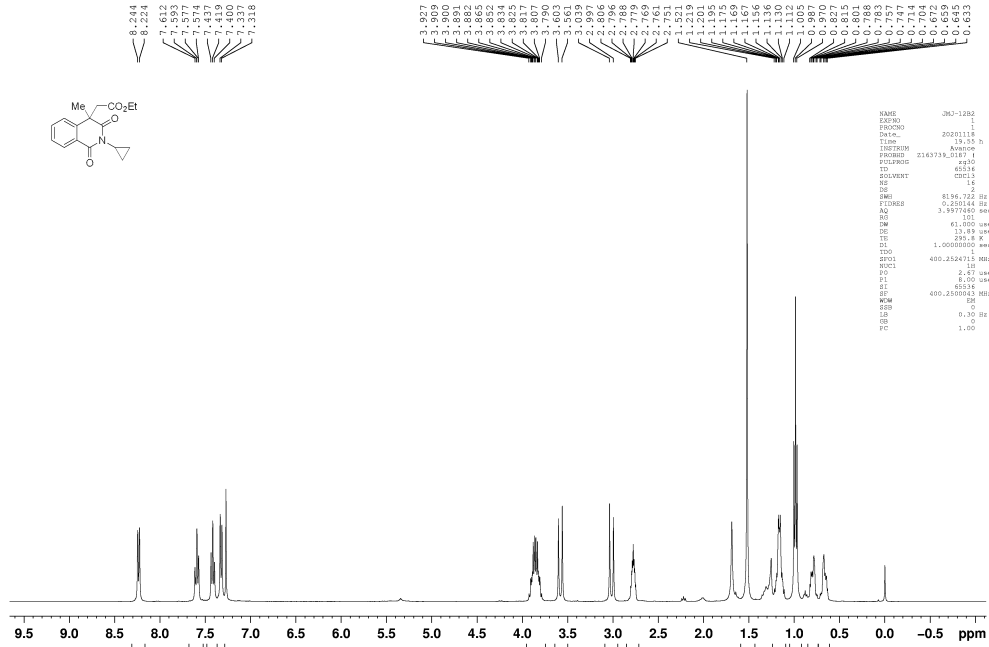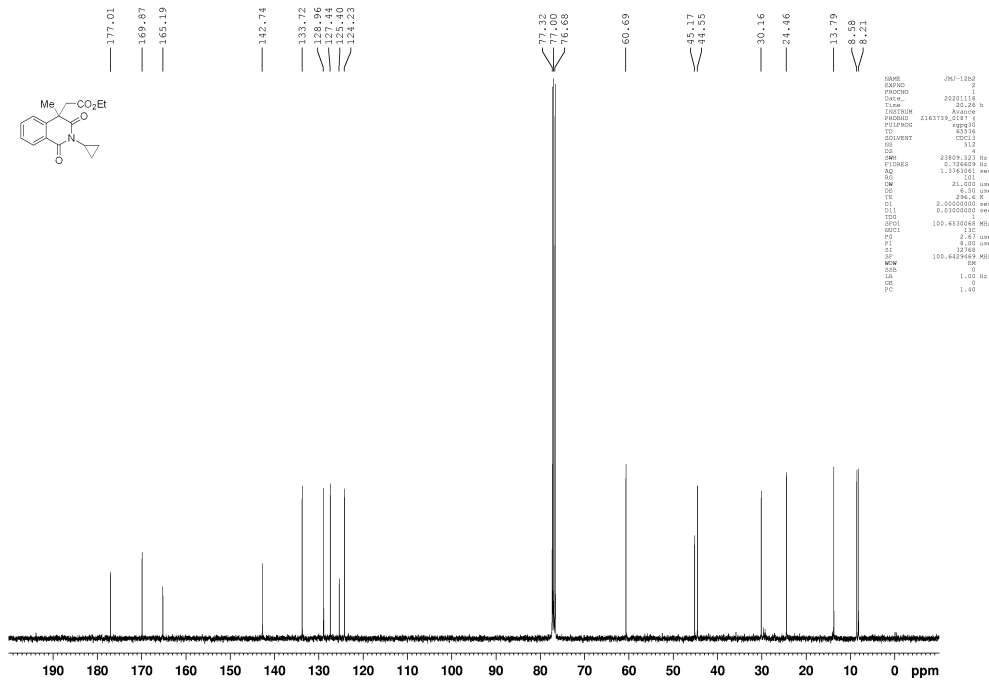

ethyl 2-(4-methyl-1,3-dioxo-2-(tetrahydro-2H-pyran-4-yl)-1,2,3,4-tetrahydroisoquinolin-4-yl)acetate (3m)

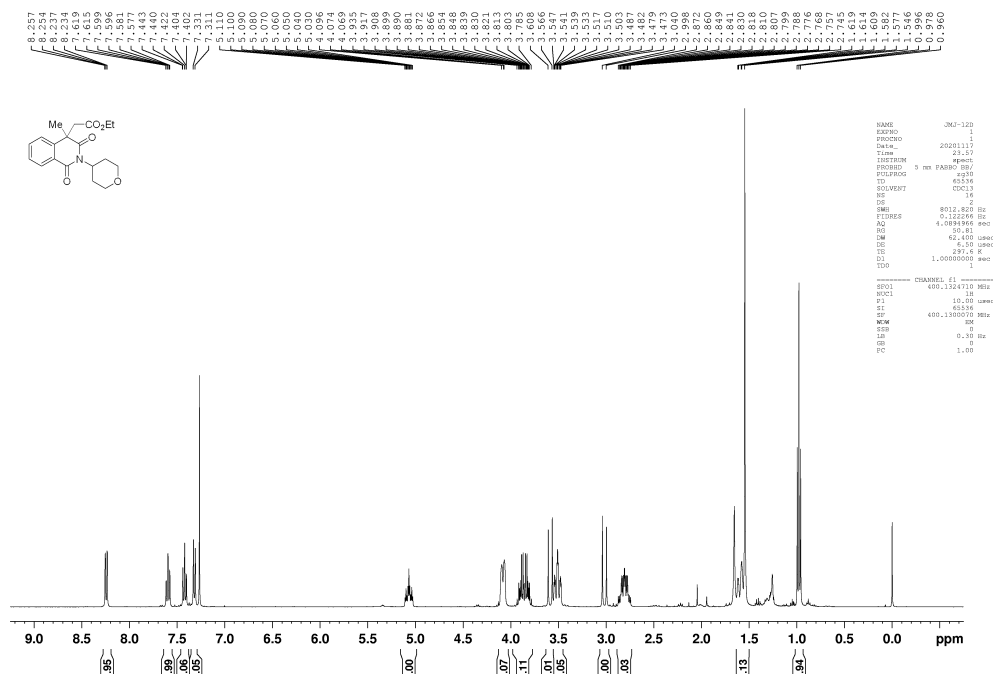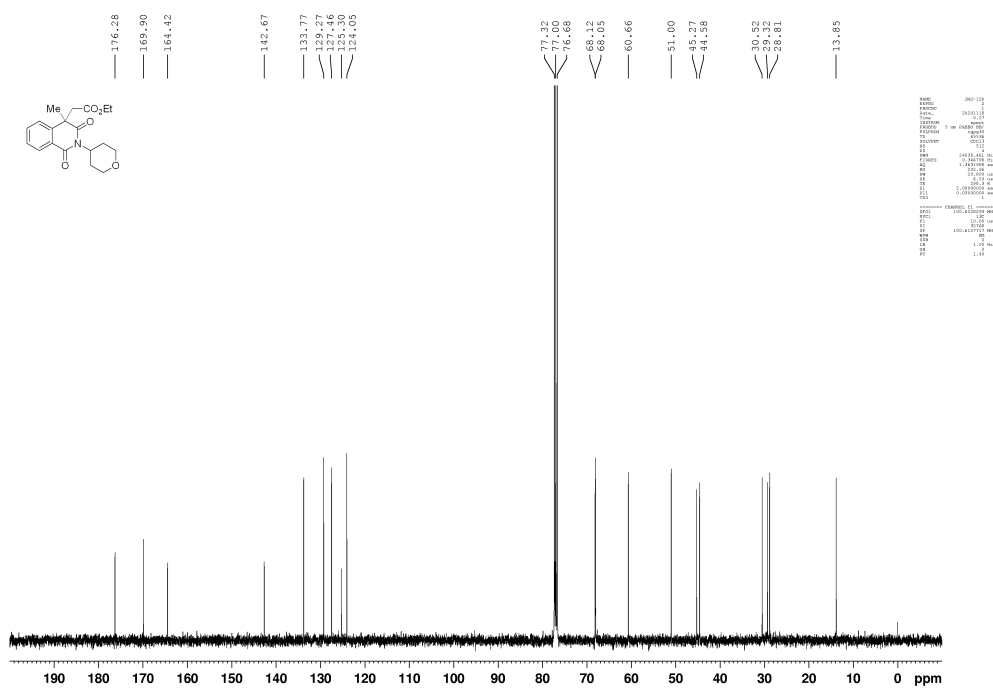



ethyl 2-(2-benzyl-4-methyl-1,3-dioxo-1,2,3,4-tetrahydroisoquinolin-4-yl)acetate  
(30)

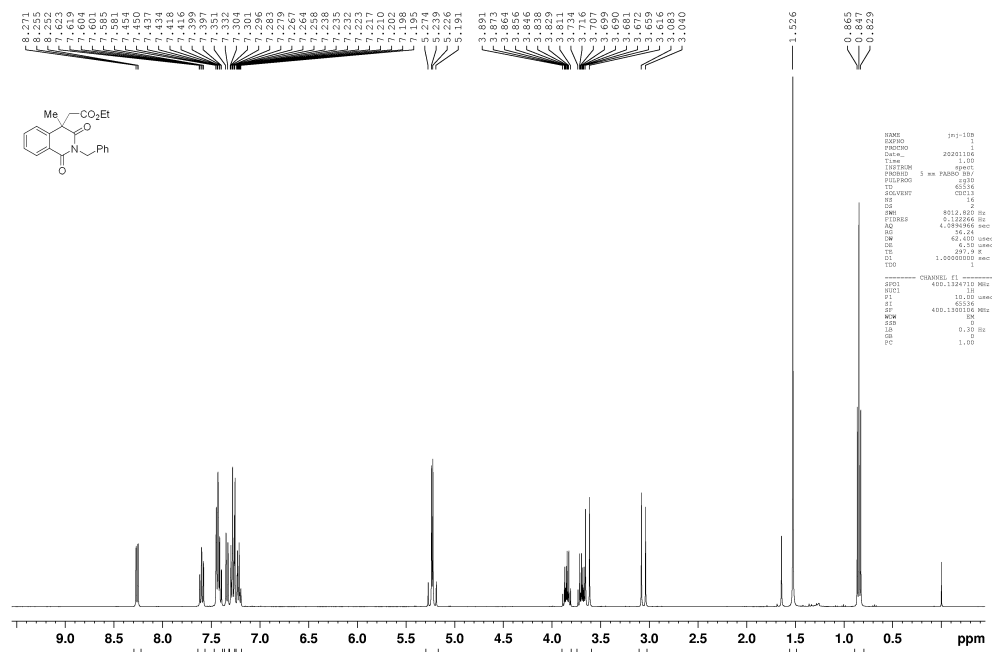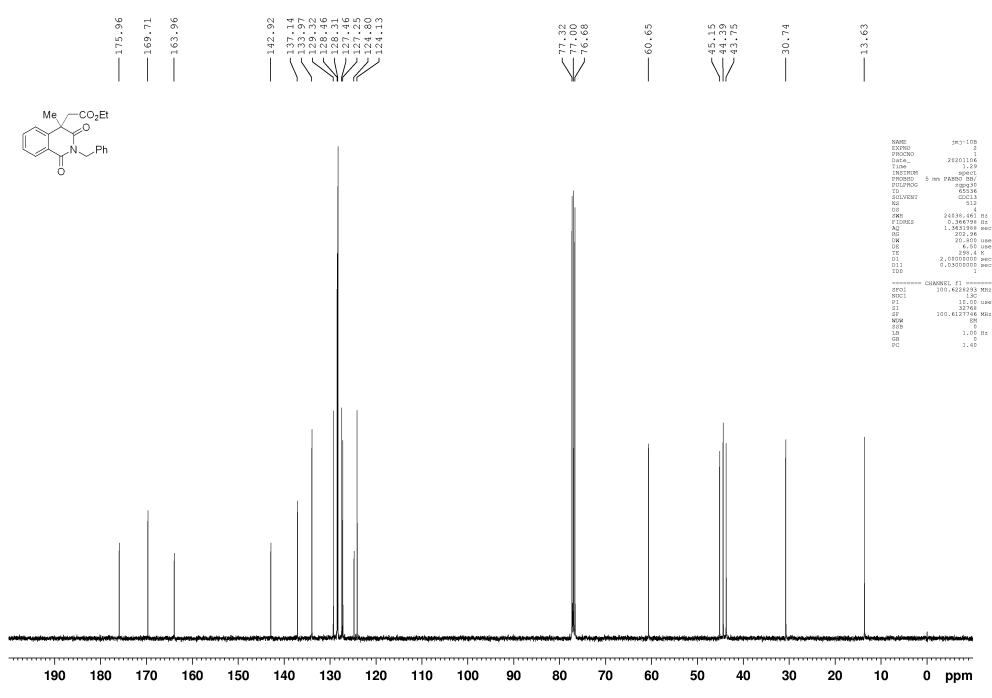

ethyl 2-(2-(2-cyanoethyl)-4-methyl-1,3-dioxo-1,2,3,4-tetrahydroisoquinolin-4-yl)acetate (3p)

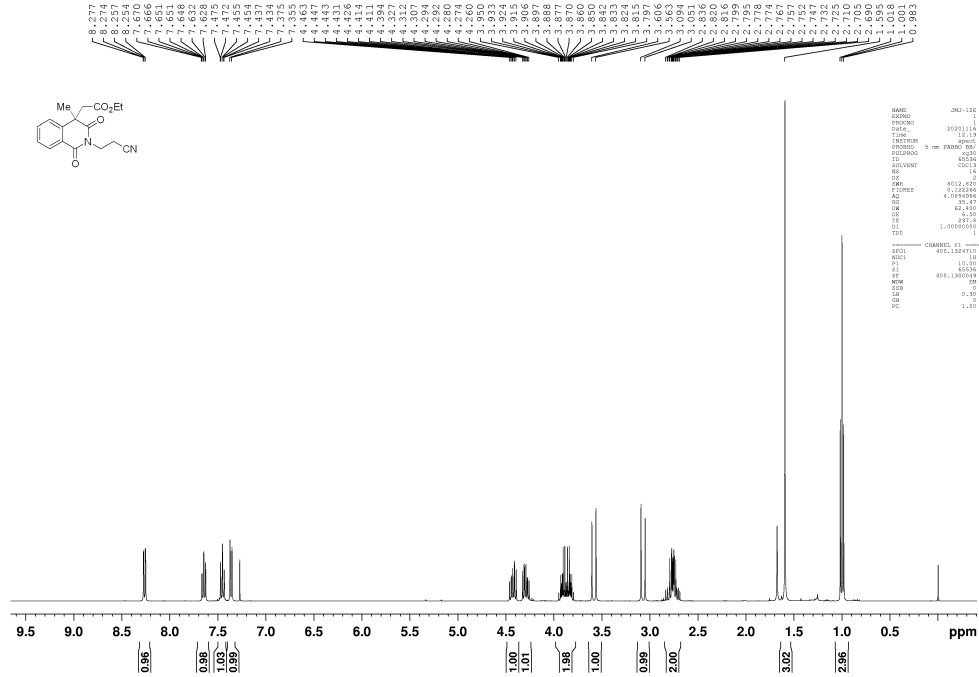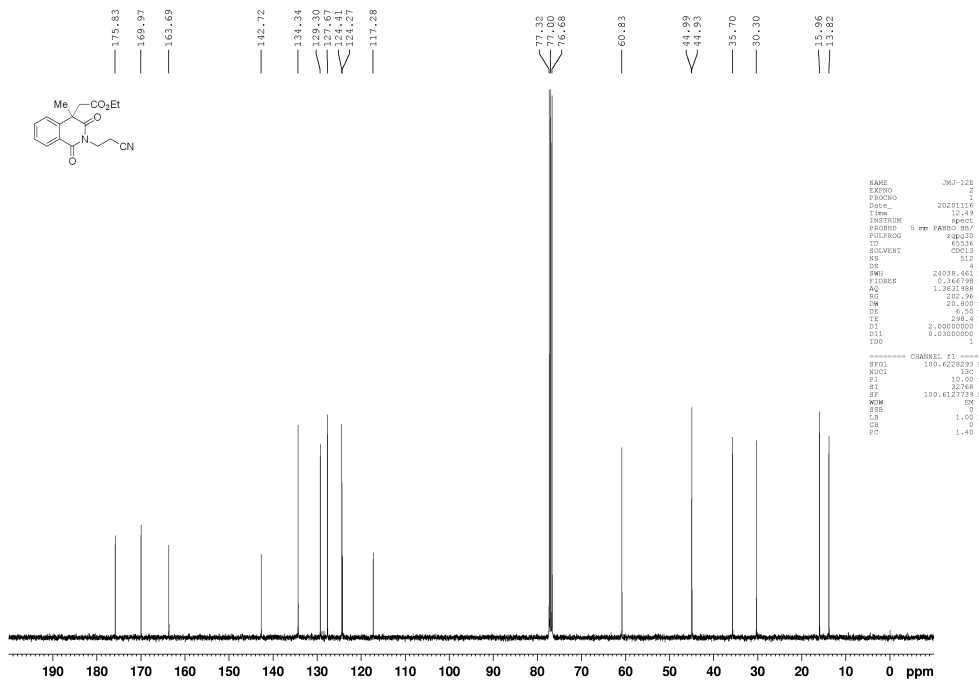

diethyl 2,2'-(4-methyl-1,3-dioxo-3,4-dihydroisoquinoline-2,4(1H)-diyl)diacetate  
(3q)

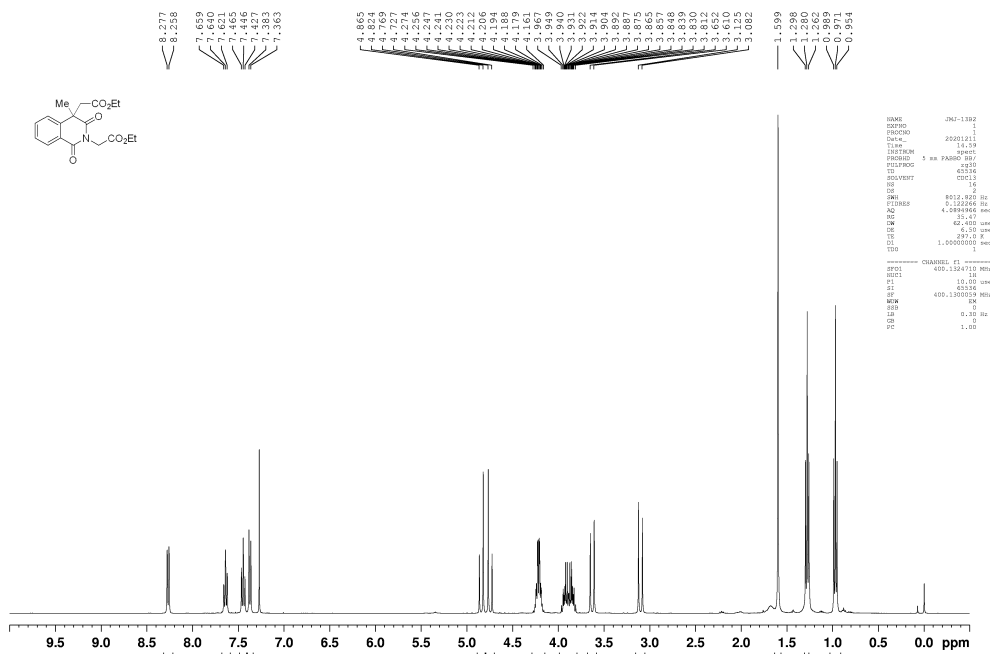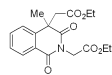

```

NAME      JMS-1392
EXPNO    2
PROCNO    1
Date_    20011211
Time     13:29
INSTRUM   spect
PROBHD    5 mm QNP300 NMR
PULPROG   zgpg30
TD        65536
SOLVENT   CDCl3
DE        0.1
AQ        0.0129200 Hz
PC        0.2122490 Hz
RG        4.0938940 sec
WDW        EM
SSB        0.0000000 sec
LB        6.150 usec
GB        0.0000000
PC        234.25 Hz
D1        1.00000000 sec
===== CHANNEL f1 =====
NUC1      13C
P1        10.00 usec
PL1       0.00 dB
SFO       100.6261200 MHz
===== CHANNEL f2 =====
NAME      JMS-1392
EXPNO    2
PROCNO    1
Date_    20011211
Time     13:29
INSTRUM   spect
PROBHD    5 mm QNP300 NMR
PULPROG   zgpg30
TD        65536
SOLVENT   CDCl3
DE        0.1
AQ        0.0129200 Hz
PC        0.2122490 Hz
RG        4.0938940 sec
WDW        EM
SSB        0.0000000 sec
LB        6.150 usec
GB        0.0000000
PC        234.25 Hz
D1        2.00000000 sec
===== CHANNEL f1 =====
NUC1      100.6261200 MHz
P1        10.00 usec
PL1       0.00 dB
SFO       100.6261200 MHz
===== CHANNEL f2 =====
NAME      JMS-1392
EXPNO    2
PROCNO    1
Date_    20011211
Time     13:29
INSTRUM   spect
PROBHD    5 mm QNP300 NMR
PULPROG   zgpg30
TD        65536
SOLVENT   CDCl3
DE        0.1
AQ        0.0129200 Hz
PC        0.2122490 Hz
RG        4.0938940 sec
WDW        EM
SSB        0.0000000 sec
LB        6.150 usec
GB        0.0000000
PC        234.25 Hz
D1        1.40 sec
===== CHANNEL f1 =====
NUC1      100.6261200 MHz
P1        10.00 usec
PL1       0.00 dB
SFO       100.6261200 MHz
===== CHANNEL f2 =====
NAME      JMS-1392
EXPNO    2
PROCNO    1
Date_    20011211
Time     13:29
INSTRUM   spect
PROBHD    5 mm QNP300 NMR
PULPROG   zgpg30
TD        65536
SOLVENT   CDCl3
DE        0.1
AQ        0.0129200 Hz
PC        0.2122490 Hz
RG        4.0938940 sec
WDW        EM
SSB        0.0000000 sec
LB        6.150 usec
GB        0.0000000
PC        1.40 sec
===== CHANNEL f1 =====
NUC1      100.6261200 MHz
P1        10.00 usec
PL1       0.00 dB
SFO       100.6261200 MHz
===== CHANNEL f2 =====

```

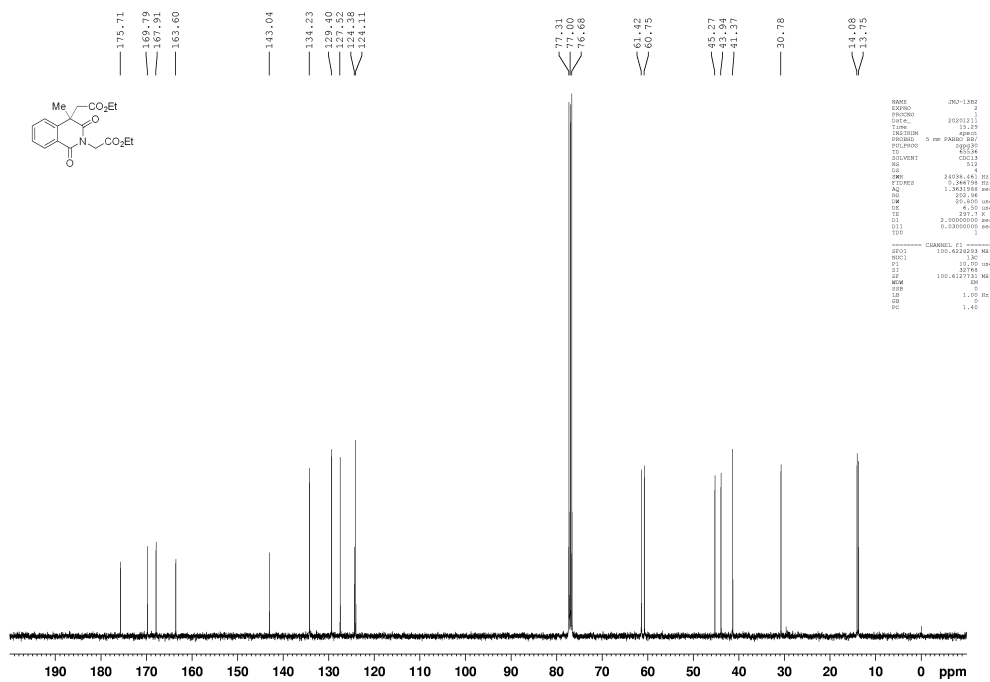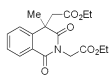

```

NAME      JMS-1392
EXPNO    2
PROCNO    1
Date_    20011211
Time     13:29
INSTRUM   spect
PROBHD    5 mm QNP300 NMR
PULPROG   zgpg30
TD        65536
SOLVENT   CDCl3
DE        0.1
AQ        0.0129200 Hz
PC        0.2122490 Hz
RG        4.0938940 sec
WDW        EM
SSB        0.0000000 sec
LB        6.150 usec
GB        0.0000000
PC        234.25 Hz
D1        2.00000000 sec
===== CHANNEL f1 =====
NUC1      100.6261200 MHz
P1        10.00 usec
PL1       0.00 dB
SFO       100.6261200 MHz
===== CHANNEL f2 =====
NAME      JMS-1392
EXPNO    2
PROCNO    1
Date_    20011211
Time     13:29
INSTRUM   spect
PROBHD    5 mm QNP300 NMR
PULPROG   zgpg30
TD        65536
SOLVENT   CDCl3
DE        0.1
AQ        0.0129200 Hz
PC        0.2122490 Hz
RG        4.0938940 sec
WDW        EM
SSB        0.0000000 sec
LB        6.150 usec
GB        0.0000000
PC        1.40 sec
===== CHANNEL f1 =====
NUC1      100.6261200 MHz
P1        10.00 usec
PL1       0.00 dB
SFO       100.6261200 MHz
===== CHANNEL f2 =====

```



ethyl 2-(4-methyl-1,3-dioxo-2-((S)-1-phenylethyl)-1,2,3,4-tetrahydroisoquinolin-4-yl)acetate (3s)

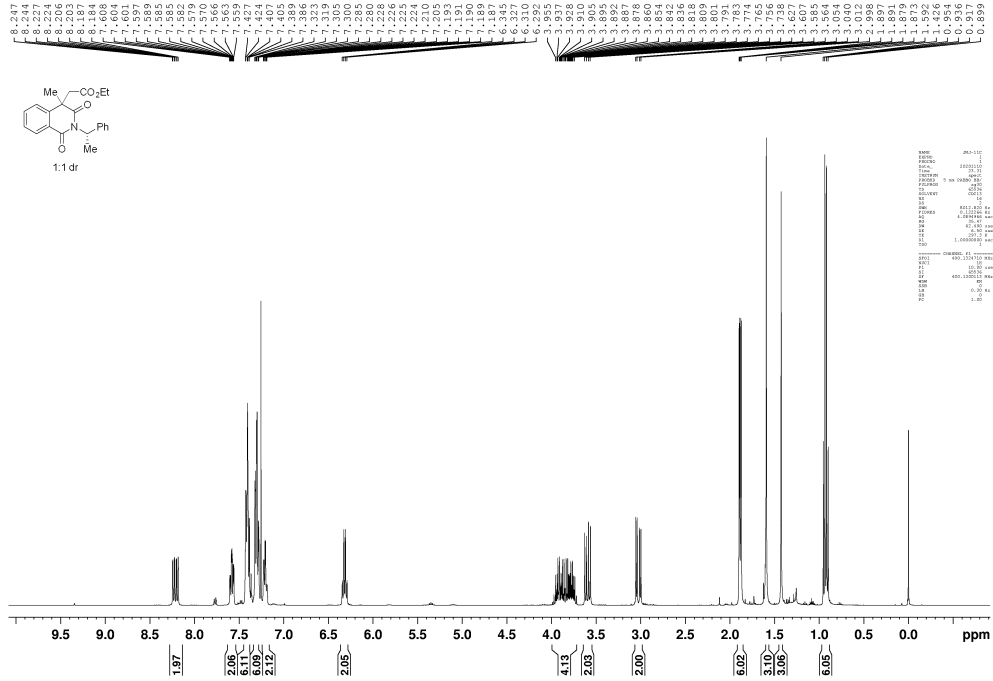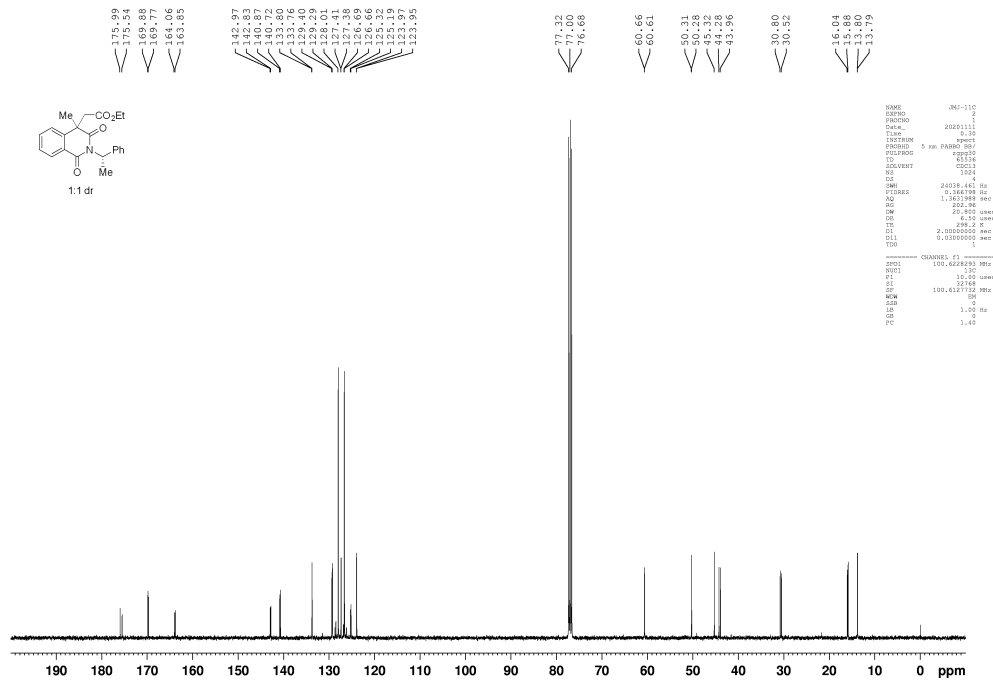





ethyl 2-(4-benzyl-2-methyl-1,3-dioxo-1,2,3,4-tetrahydroisoquinolin-4-yl)acetate  
(3u)

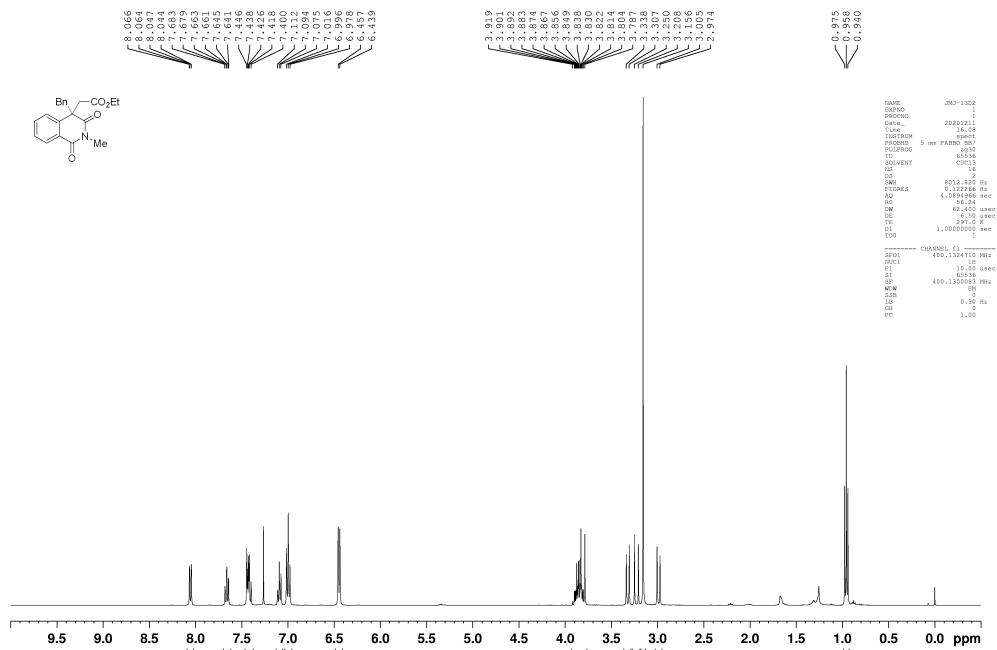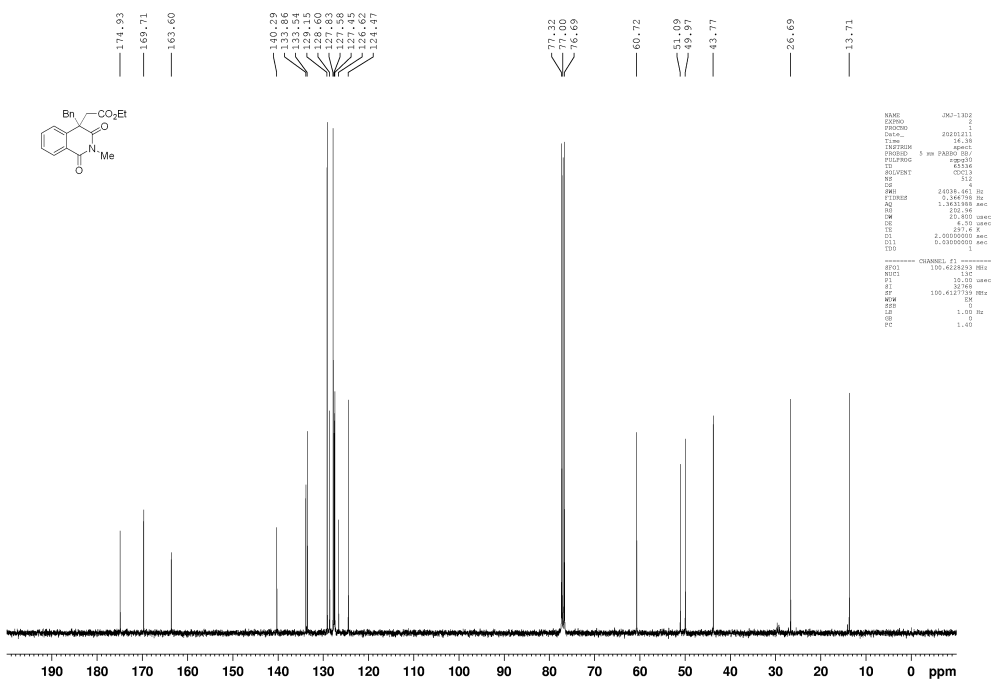

ethyl 2-(2-methyl-1,3-dioxo-4-phenyl-1,2,3,4-tetrahydroisoquinolin-4-yl)acetate  
(3v)

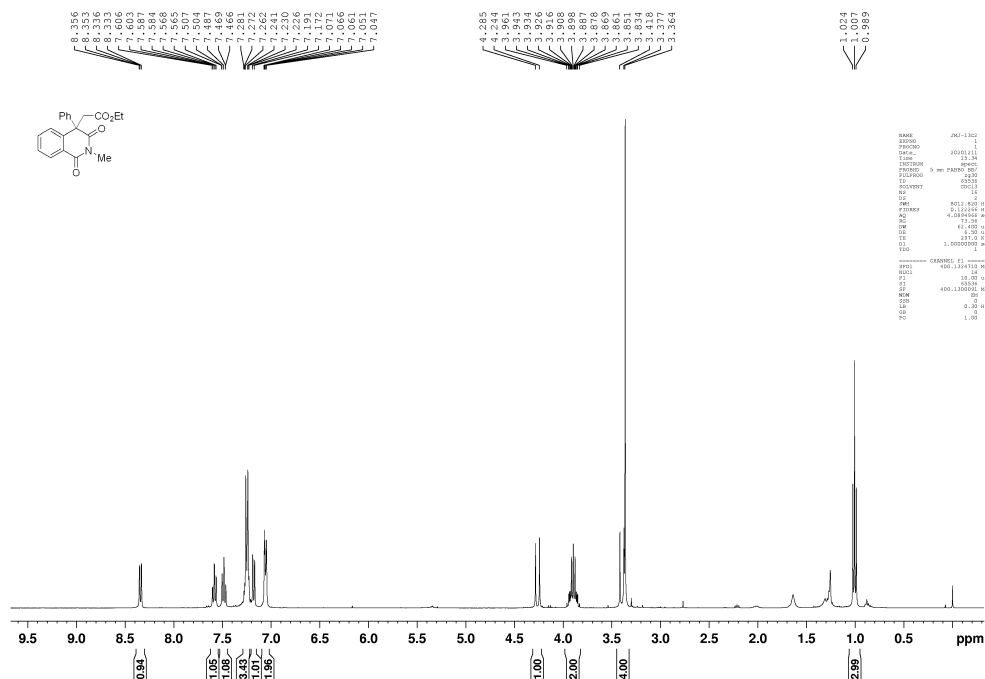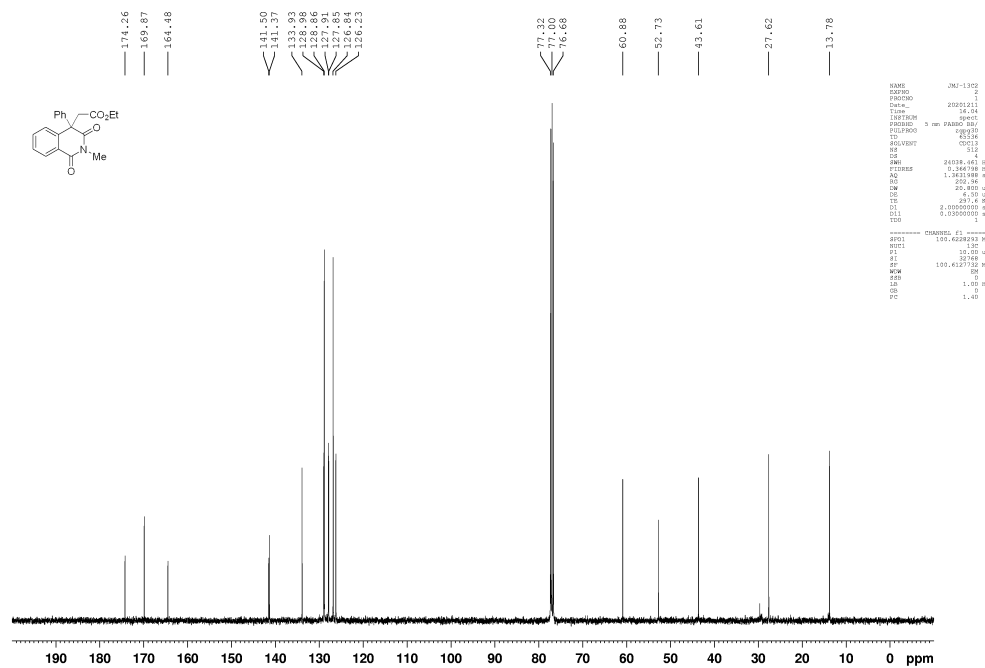

**methyl 2-(2-(2-cyanoethyl)-4-methyl-1,3-dioxo-1,2,3,4-tetrahydroisoquinolin-4-yl)acetate (4a)**

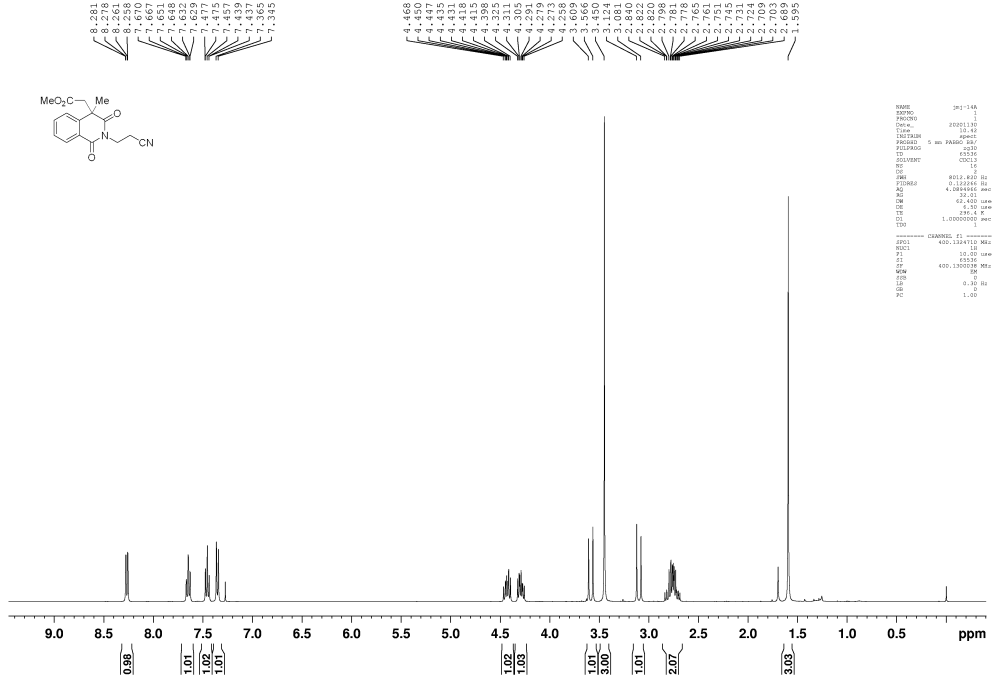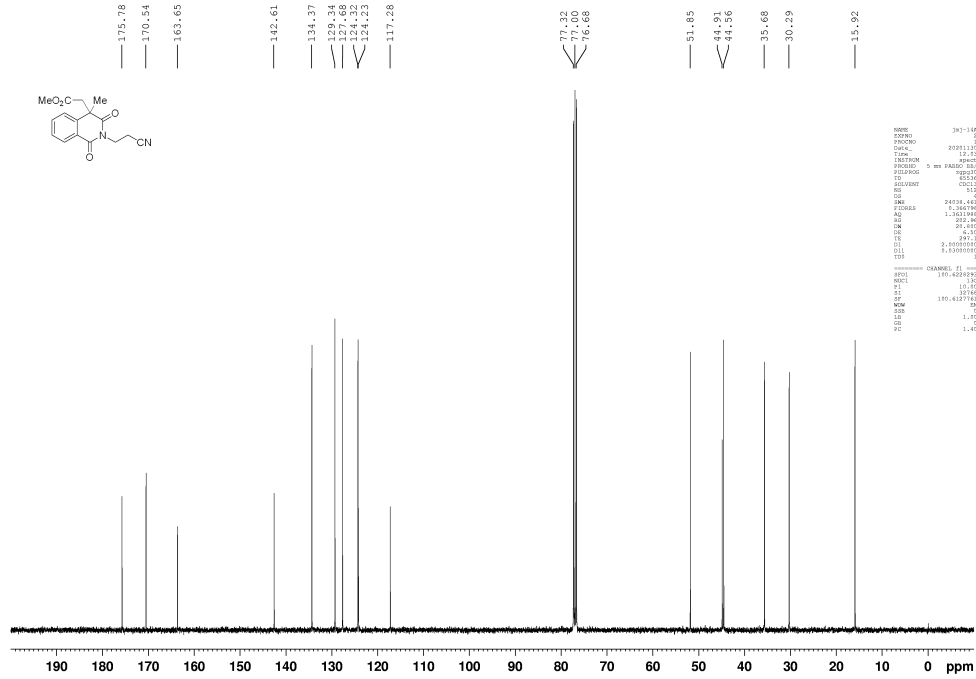

hexadecyl 2-(2-(2-cyanoethyl)-4-methyl-1,3-dioxo-1,2,3,4-tetrahydroisoquinolin-4-yl)acetate (4b)

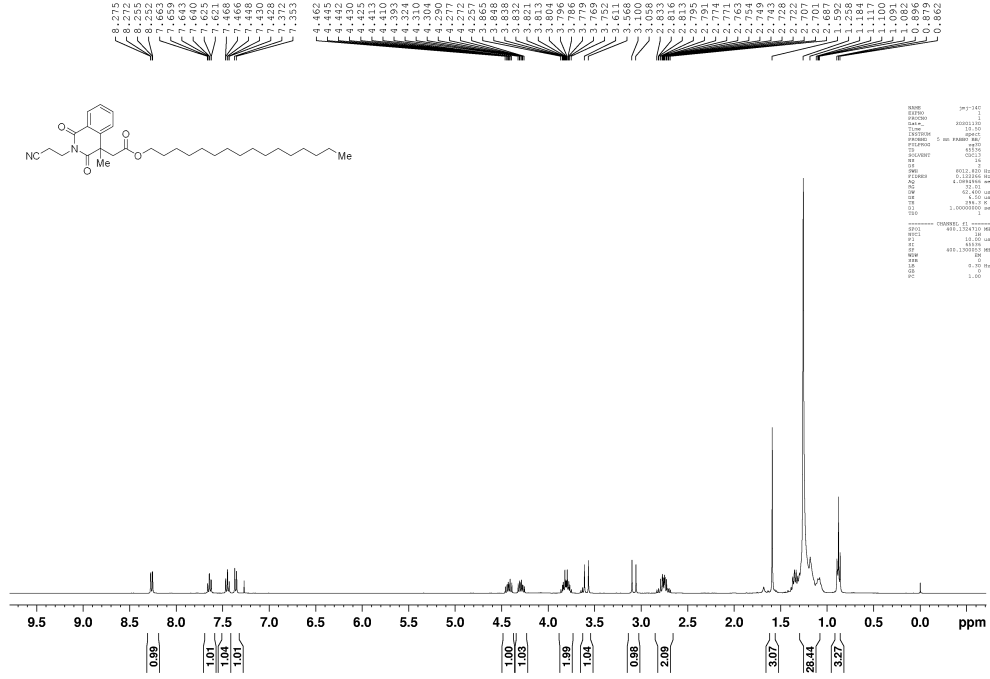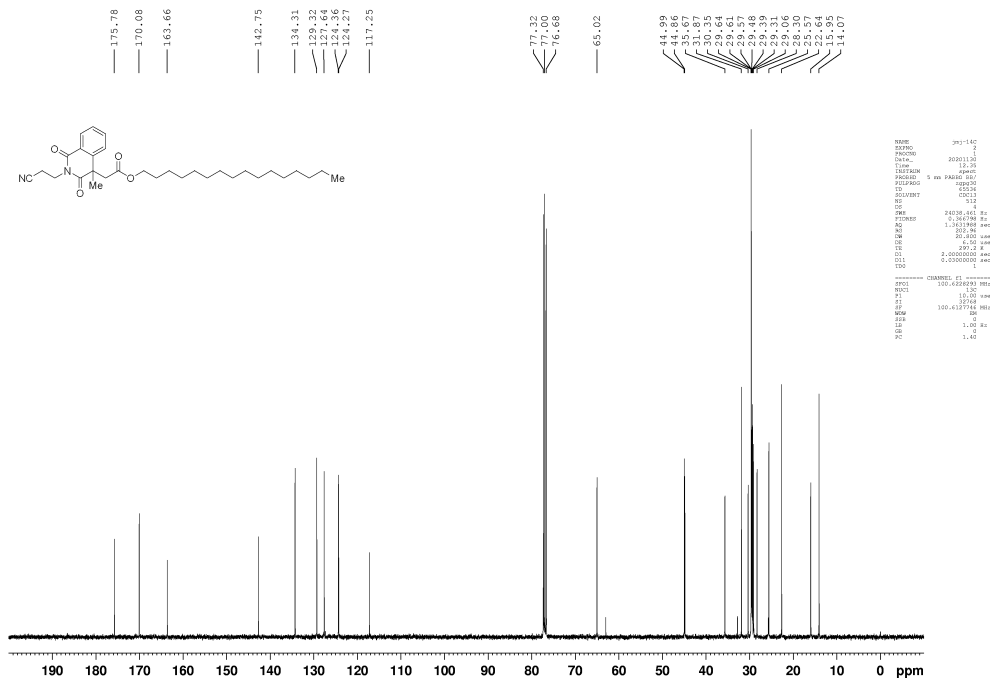





**(3S,5S,8R,9S,10S,13R,14S,17R)-10,13-dimethyl-17-((R)-6-methylheptan-2-yl)hexadecahydro-1H-cyclopenta[a]phenanthren-3-yl 2-(2-(2-cyanoethyl)-4-methyl-1,3-dioxo-1,2,3,4-tetrahydroisoquinolin-4-yl)acetate (4e)**

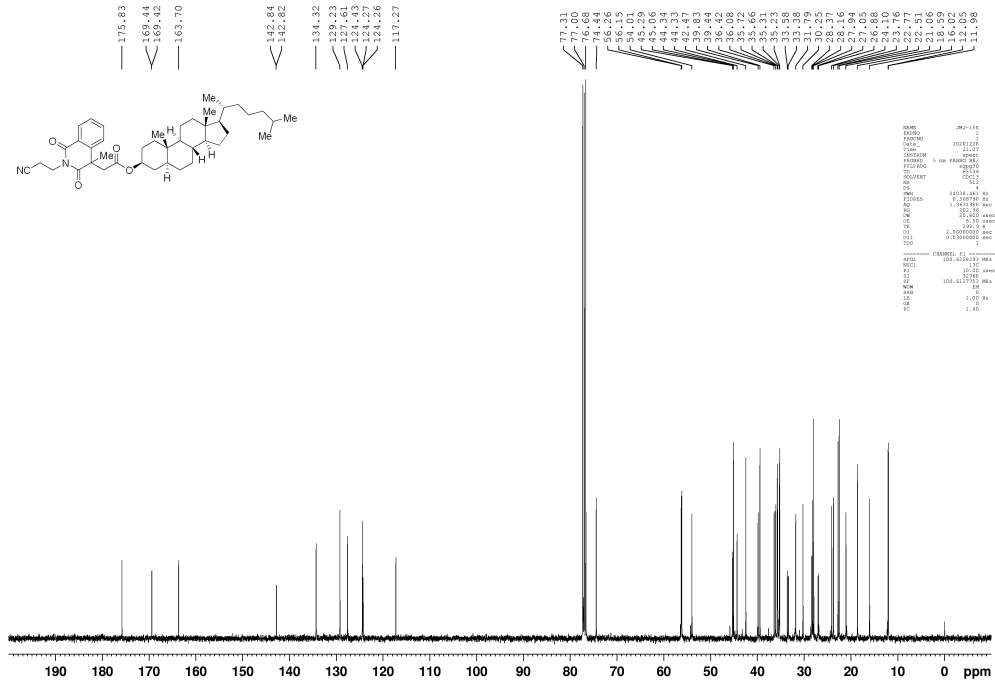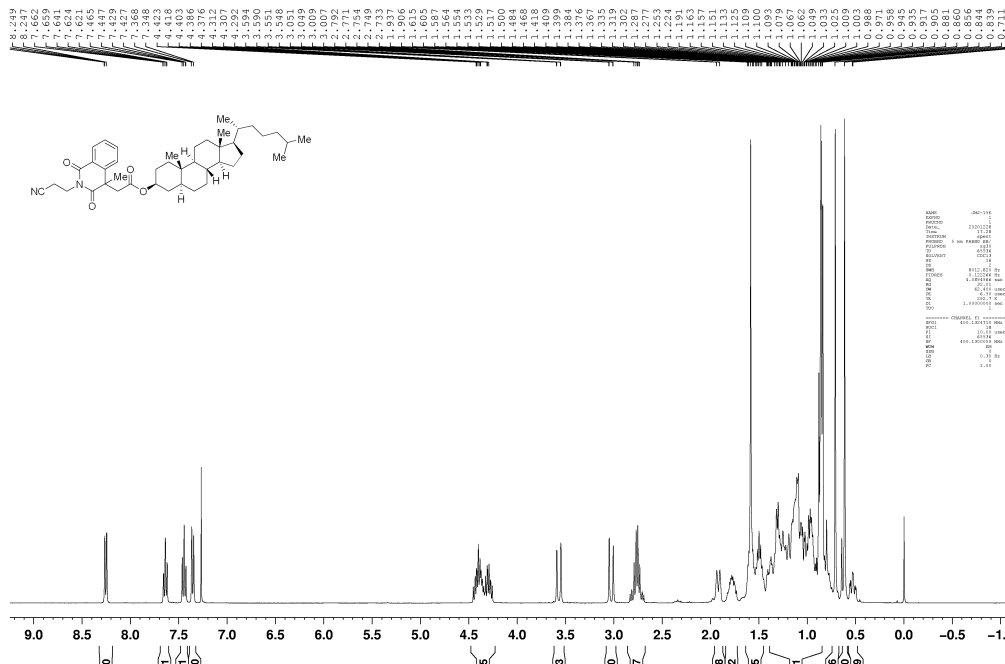



**(3R,5S,8R,9S,10S,13S,14S)-10,13-dimethyl-17-oxohexadecahydro-1H-cyclopenta[a]phenanthren-3-yl 2-(2-(2-cyanoethyl)-4-methyl-1,3-dioxo-1,2,3,4-tetrahydroisoquinolin-4-yl)acetate (4f)**

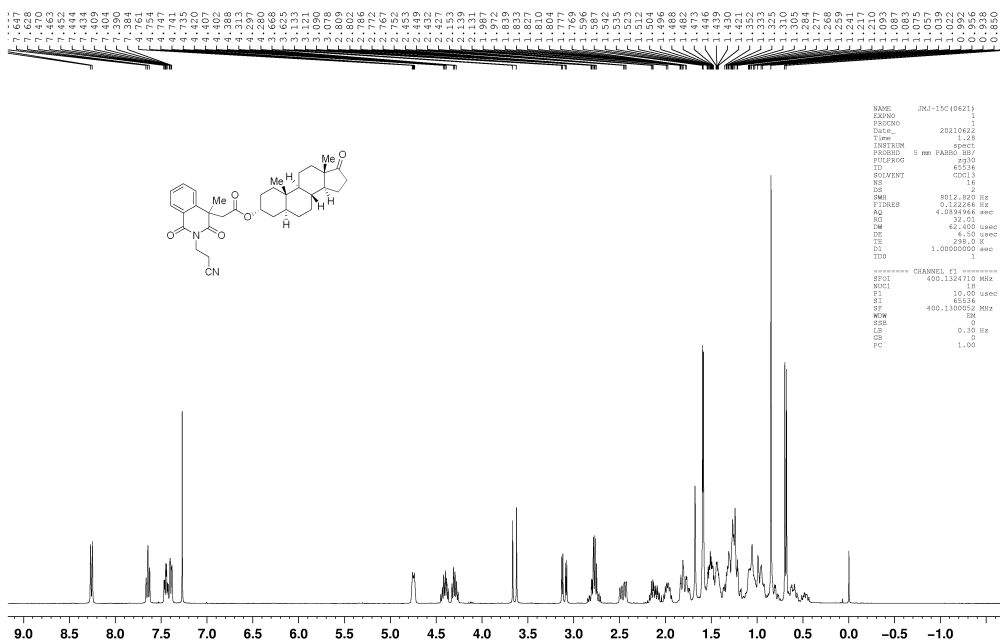

**(1R,2R)-2-(1,3-dioxisoindolin-2-yl)cyclohexyl 2-(2-(2-cyanoethyl)-4-methyl-1,3-dioxo-1,2,3,4-tetrahydroisoquinolin-4-yl)acetate (4g)**

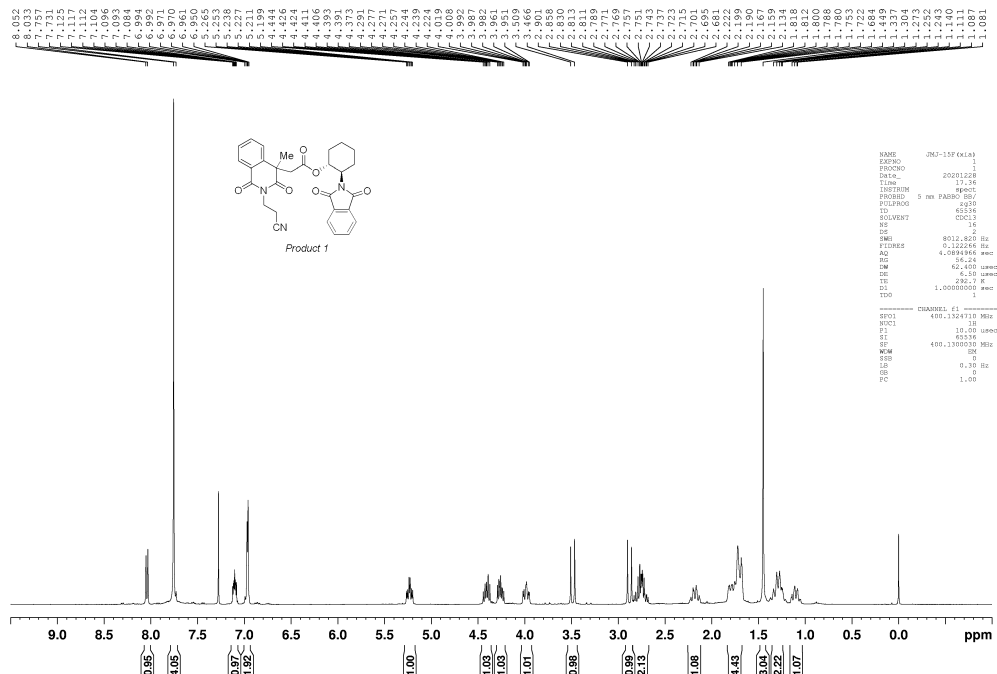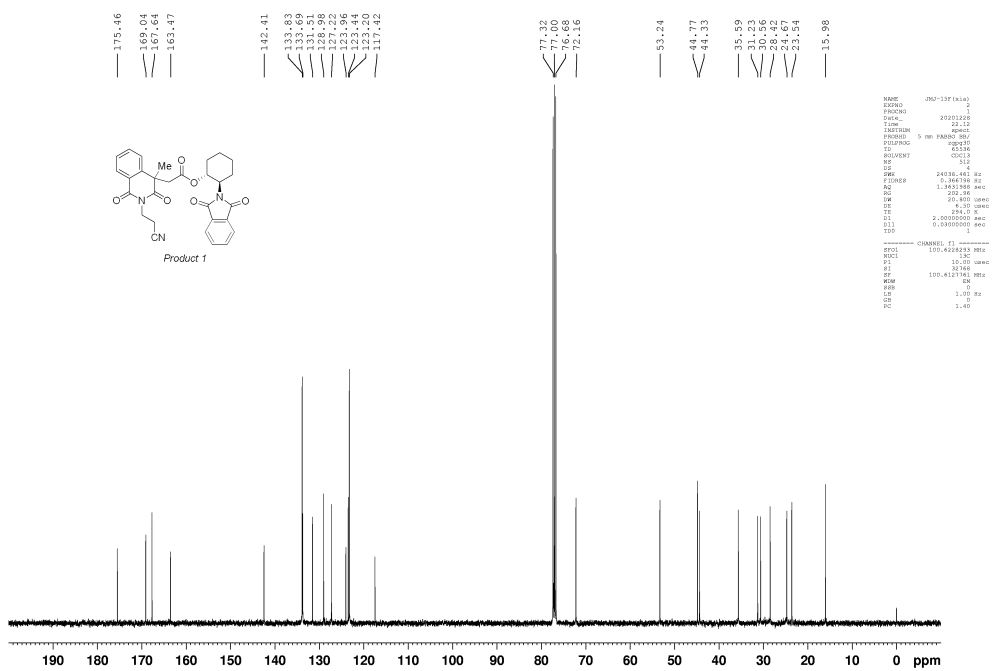

Supplement: d1qo01368h1.pdf [file d1qo01368h1.pdf]
